# 1 Adaptive foraging behaviour increases vulnerability to climate change

2

3

4 Benoit Gauzens<sup>1,2,\*</sup>, Benjamin Rosenbaum<sup>1,2</sup>, Gregor Kalinkat<sup>3</sup>, Thomas Boy<sup>1,2</sup>, Malte

5 Jochum<sup>4,5</sup>, Susanne Kortsch<sup>6</sup>, Eoin J. O’Gorman<sup>7</sup>, Ulrich Brose<sup>1,2</sup>

6

7 <sup>1</sup> EcoNetLab, German Centre for Integrative Biodiversity Research (iDiv) Halle-Jena-Leipzig,  
8 Leipzig, Germany

9 <sup>2</sup> Institute of Biodiversity, Friedrich Schiller University Jena, Jena, Germany

10 <sup>3</sup> Department of Ecohydrology, Leibniz Institute of Freshwater Ecology and Inland Fisheries  
11 (IGB), Berlin, Germany

12 <sup>4</sup> Experimental Interaction Ecology, German Centre for Integrative Biodiversity Research (iDiv)  
13 Halle-Jena-Leipzig, Leipzig, Germany

14 <sup>5</sup> Leipzig University, Institute of Biology, Leipzig, Germany

15 <sup>6</sup> Department of Agricultural Sciences, University of Helsinki, Finland

16 <sup>7</sup> School of Life Sciences, University of Essex, Wivenhoe Park, Colchester CO4 3SQ, UK

17 \* Corresponding author: [benoit.gauzens@idiv.de](mailto:benoit.gauzens@idiv.de)

18

19

20

## 21 **Abstract:**

22

23 Adaptative foraging behaviour should promote species coexistence and biodiversity under  
24 climate change as consumers are expected to maximise their energy intake, according to  
25 principles of optimal foraging theory. We test these assumptions using a unique dataset  
26 comprising (1) 22,185 stomach contents of fish species across functional groups and feeding  
27 strategies and (2) prey availability in the environment over 12 years. We explore how foraging  
28 behavior responds to variance in ecosystem productivity and temperature. Our results show that  
29 foraging shifts from trait-dependent prey selectivity to simple density dependence in warmer and  
30 more productive environments. Contrary to classical assumptions, we show that this  
31 behavioural change leads to lower consumption efficiency as species shift away from their  
32 optimal trophic niche. Dynamic food-web modeling demonstrates that this behavioral response  
33 to warming could undermine species persistence and biodiversity. By integrating empirical  
34 adaptive foraging behavior into dynamic models, our study reveals higher risk profiles for  
35 ecosystems under global warming.

36

## 37 Introduction

38

39 Ecosystems are experiencing abrupt changes in climatic conditions, making it ever more  
40 important to predict and understand how they will respond to future changes. Global warming  
41 will affect various levels of biological organisation; from physiological processes occurring at the  
42 individual level<sup>1,2</sup> to patterns at macroecological scales<sup>3,4</sup>. Warming impacts will cascade  
43 through these different organisational levels, changing species composition<sup>5</sup> as well as  
44 community and food web structure<sup>6-8</sup>. By scaling up temperature effects from species  
45 physiology to food webs<sup>9</sup>, trophic interactions play a key role in the response of ecosystems to  
46 global warming<sup>10</sup>.

47 To assess the future of ecological communities, food web models that build on biological  
48 processes observed at the level of individual organisms can be used to translate mechanisms  
49 and predictions to the ecosystem level. For example, Allometric Trophic Networks<sup>11</sup> (ATN)  
50 quantify effects of body mass and temperature on the biological rates of consumers and  
51 resources to predict species biomass changes over time and across environmental  
52 conditions<sup>11,12</sup>. Thus, ATNs facilitate understanding of how physiological responses to warming  
53 translate into species coexistence and biodiversity<sup>12</sup>. However, the ability of ATNs to derive  
54 sound predictions for large communities under changing environmental conditions has been  
55 challenged, stressing the need for more biological realism<sup>10,15</sup>.

56 Indeed, a strong limitation of these models is that species are characterised by a set of  
57 biological rates that respond to temperature, such as metabolic or attack rates<sup>16-18</sup>. Therefore,  
58 species are limited to physiological response to warming, whereas the behavioural component  
59 is largely ignored. However it is well established that species also respond to warming by  
60 changing their behaviour<sup>19,20</sup>, and that this is a key variable in supporting species coexistence<sup>21-</sup>  
61 <sup>25</sup>, which needs to be incorporated into food web models to improve their predictive power.

62 Energetic demands increase with temperature, but species can offset this by adopting various  
63 strategies to increase their energy intake. Species can actively forage on more rewarding  
64 resources<sup>27,28</sup>, typically prey that are close to the maximum body mass that consumers can feed  
65 on<sup>29</sup>. Therefore we expect that predators consume larger prey (trait-based selectivity) at higher  
66 temperatures, reducing predator-prey body mass ratios (H1). Alternatively, individuals under  
67 high energetic stress may accept less rewarding (smaller, but more abundant) prey upon  
68 encounter (H2) leading to a lower trait-based selectivity, and a trophic niche driven more by  
69 neutral processes (random encounter probability). The two proposed hypotheses would lead to  
70 contrasting effects on communities. Trait-based selectivity (H1) may increase the strength of

71 consumer interactions with a limited set of prey, depleting the latter's biomass. Alternatively, if  
72 neutral processes are driving selectivity (H2), consumers will mostly forage on abundant  
73 species, leading to a stronger control of their biomass, which could prevent competitive  
74 exclusion and therefore enhance species coexistence<sup>25,32</sup>. To test these hypotheses, we  
75 compiled a database of 22,185 stomach contents from 6 demersal fish species and analysed  
76 the response of these consumers to changes in temperatures and productivity. Subsequently,  
77 we addressed the consequences of these empirical relationships by integrating them into a  
78 population-dynamical model to predict how species coexistence changes with warming.

79

## 80 **Response of fish to temperature and productivity gradients**

81

82 We used our database to document how consumer foraging behaviour responds to temperature  
83 and productivity. The six fish species considered belong to two functional groups differing in  
84 body shape and foraging behaviour (flat, sit-and-wait predators versus fusiform, active hunters).  
85 We used skewed normal distributions to fit the prey body mass distributions observed in fish  
86 stomachs (hereafter called the *realised distribution*) and in their environment (hereafter called  
87 the *environmental distribution*) (Fig. 1). The environmental distribution defines what is expected  
88 if neutral processes drive fish diets: it represents the expected body mass distribution of prey in  
89 fish stomachs if consumption were driven by density-based encounter rates only. However,  
90 these two distributions are usually not identical, because consumers actively select prey with  
91 specific body masses. We used the ratio of realised and environmental distributions to calculate  
92 fish selectivity with respect to these different prey body masses to obtain a *preference*  
93 *distribution* (see Fig. 1, Methods). This preference distribution describes consumer selectivity  
94 based on traits (i.e. the prey body masses that allow an interaction) and consumer behavioural  
95 decisions.

96

97

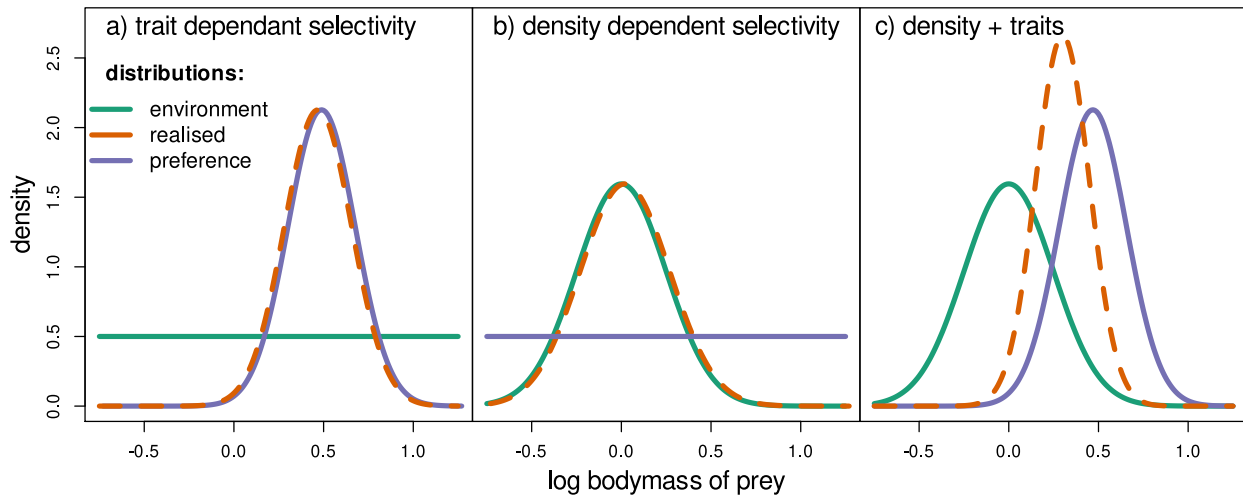

98

99 Fig. 1: Presentation of the different distributions of fish prey body mass. The environmental distribution  
100 (green) represents the distribution of prey body mass in the ecosystem. The realised distribution (dashed  
101 red) represents the body mass of the prey in a consumer stomach, and the preference distribution (blue)  
102 represents the selectivity of a consumer towards a specific prey body mass. a) All of the log prey body  
103 masses are equally represented in the environment so the distribution of prey body masses observed in a  
104 consumer's gut represents the body masses on which it actively foraged (its preference distribution)  
105 and predation is driven by trait selectivity only (hypothesis 1). b) The body mass distribution of the prey  
106 observed in the gut and in the environment are equivalent, so the prey consumed by the predator were  
107 entirely driven by encounter probabilities (i.e. a neutral process), implying no active selectivity over  
108 specific prey size classes (hypothesis 2). Panels a) and b) represent extreme scenarios while real-world  
109 data are more likely to be described by two different distributions, as in c) where the body mass  
110 distribution of prey observed in the stomach and in the environment differs, so that the consumer  
111 specifically forages on some prey body masses that are represented by the preference distribution. High  
112 values in the preference distribution represent body masses that are over-represented in fish stomachs in  
113 comparison to what is available in the environment.

114

115

116 We first considered how the body mass distributions in consumer stomachs were changing with  
117 predator body mass and foraging strategy, as well as environmental conditions (temperature  
118 and productivity) using a linear model to predict the median of the realised distribution.

119 We selected the most parsimonious model based on AIC. In cases of a significant interaction  
120 between temperature and productivity, we presented the effect of temperature at two different  
121 levels of productivity (which is a continuous variable) that correspond to the two modes of the  
122 distribution of environmental productivity (SI II). As expected<sup>33,34</sup>, we observed that the median  
123 of prey body mass increased with predator body mass (Fig. 2a, b, Table 1).

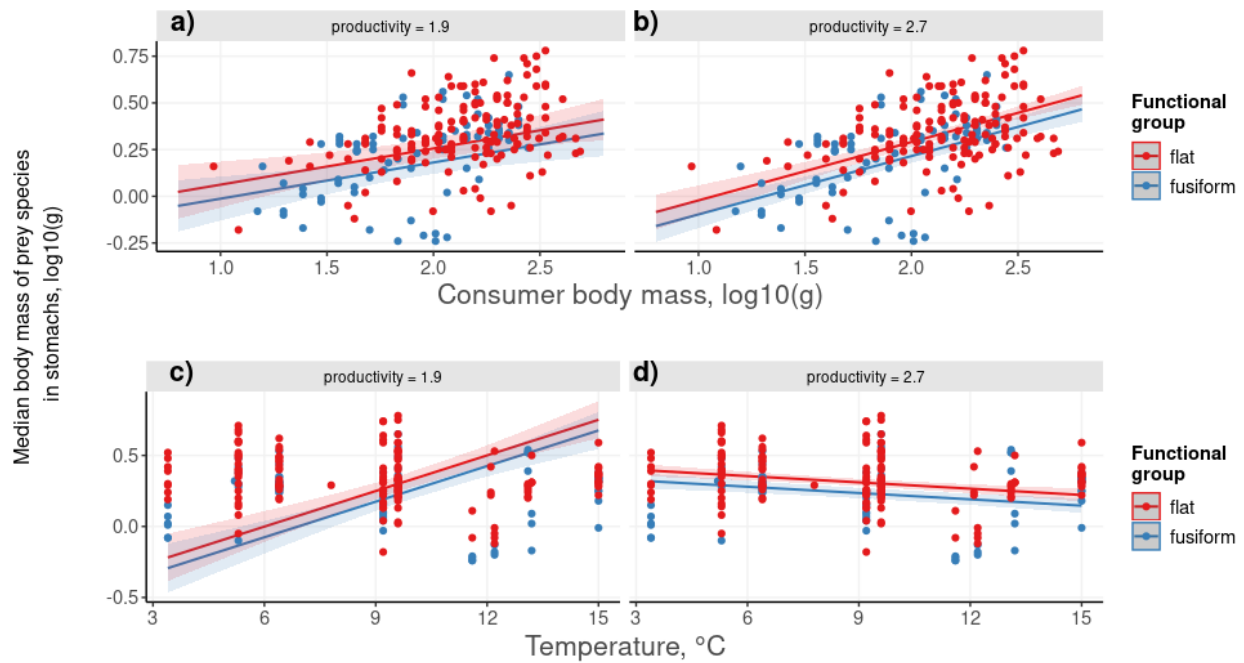

124

125 Fig. 2: Response of the median body mass of the realised prey body mass distribution to predator body  
 126 mass (a, b), and temperature (c, d) at different productivity levels for the two fish functional groups. Points  
 127 represent non-transformed data across all productivity levels and lines present model predictions. The  
 128 shaded areas show the 95% confidence interval on the predicted values. Colours represent the fish  
 129 functional groups (flat versus fusiform).

130

131 The effect of temperature depended  
 132 on environmental productivity: the  
 133 body mass of consumed prey  
 134 increased with temperature at low  
 135 environmental productivity, but tended  
 136 to decrease at higher productivity (Fig  
 137 2c, d, Table 1). Interestingly, the  
 138 response of prey body mass was  
 139 identical for the two different predator  
 140 body shapes and foraging strategies.  
 141 These effects alone are insufficient to  
 142 describe a change in fish behaviour as  
 143 the distribution of prey body mass also  
 144 changes along environmental

Table 1: response of the realised distribution to predator body mass and environmental gradients

| Predictors                               | median of the realised distribution |               |        |
|------------------------------------------|-------------------------------------|---------------|--------|
|                                          | Estimates                           | CI            | p      |
| (Intercept)                              | -2.63                               | -3.68 – -1.57 | <0.001 |
| Predator body mass                       | -0.13                               | -0.50 – 0.25  | 0.509  |
| Productivity                             | 0.91                                | 0.51 – 1.31   | <0.001 |
| Shape (fusiform)                         | -0.08                               | -0.12 – -0.03 | 0.001  |
| Temperature                              | 0.33                                | 0.25 – 0.41   | <0.001 |
| pred. BM:Productivity                    | 0.16                                | 0.01 – 0.30   | 0.034  |
| Productivity:Temperature                 | -0.13                               | -0.16 – -0.10 | <0.001 |
| Observations                             | 223                                 |               |        |
| R <sup>2</sup> / R <sup>2</sup> adjusted | 0.449 / 0.434                       |               |        |

145 gradients (SI II). To disentangle the effect of prey availability (neutral processes) from the fish  
146 behavioural response, we estimated the preference distribution that depicts fish selectivity  
147 independently of the environmental prey distribution (see Methods). We analysed the response  
148 of this fish preference distribution in the same way as for the realised distribution. Our results  
149 confirm the importance of species traits for structuring trophic interactions, as larger fish are  
150 foraging on larger prey (Fig. 3a). They also emphasize that ecosystem productivity alters the  
151 temperature-dependence of fish foraging behaviour with a significant interaction between  
152 temperature and productivity (Fig 3b, Table 2). The temperature effect was only significant  
153 above a productivity threshold of  $10^{2.52}$  (SI III) indicating that fish only adapted their feeding  
154 behaviour to temperature by foraging on smaller prey in warmer conditions when resources  
155 were plentiful. We did not detect any interaction between fish shape and other covariates,  
156 suggesting that the behavioural responses to temperature and productivity are similar for fish  
157 species with different body shape and foraging strategies.  
158

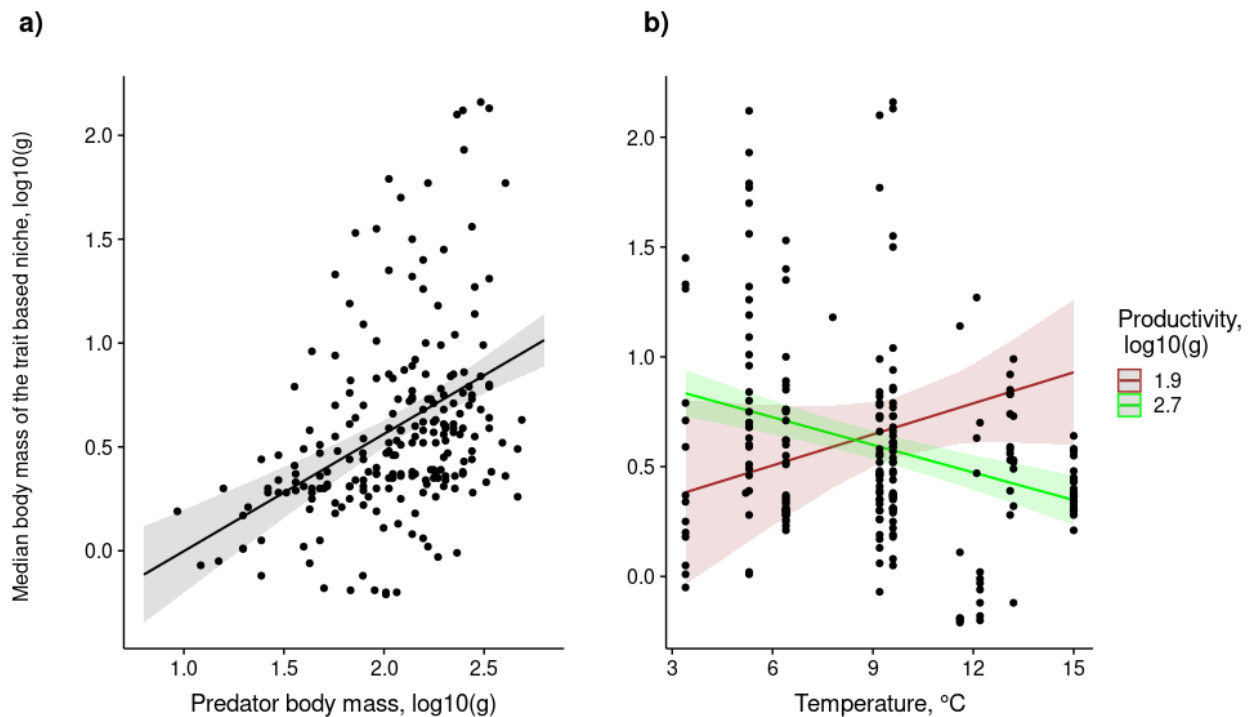

159  
160  
161  
162  
163  
164  
165  
166

Fig. 3: Response of the median prey body mass of the preference distribution to predator body mass, temperature and productivity. Points represent non-transformed data across all productivity levels and lines represent model predictions. The shaded areas show the 95% confidence interval on the predicted values. Grey and green colour represent two different productivity levels at which the temperature effect is represented.

167 The energetic stress that warming imposes on individuals through increased metabolic rates  
168 should be mitigated by higher feeding rates at higher prey availability in more productive  
169 environments. Thus, because the effects of temperature and productivity should cancel each  
170 other out, we expected a stronger adaptive response at low productivity, where consumers must  
171 cope with maximum energetic stress. Surprisingly, we did not find a significant effect of  
172 temperature on preference for prey sizes in the least productive environments (Fig. 3b, SI III).  
173 One explanation for this may relate to the generally low productivity of the Baltic Sea at the  
174 period of our study<sup>35,36</sup>. At very low productivity, fish are experiencing high energetic stress  
175 (regardless of temperature) because resource density is low and they cannot afford to miss a  
176 prey upon encountering it, even if this prey is far from their preferred body size. Under such  
177 stressful conditions, there may be no scope for predators to adapt their feeding behaviour as  
178 temperature increases. In more productive environments, feeding behaviour may be less  
179 constrained, increasing the adaptive capacity of the fish. Indeed, under such conditions, a cold  
180 temperature corresponds to low energetic stress due to a combination of low energetic demand  
181 and high resource availability), which allows fish to select prey based on traits. However,  
182 warming increases energetic stress because the resource availability is similar whereas the  
183 energetic demand rises, forcing fish to engage in non-selective behaviour.

184  
185 Therefore, our results support hypothesis 2 that as temperature increases in productive  
186 environments, fish become less selective for prey size so as not to miss foraging opportunities,  
187 which is consistent with what happens at any temperature when productivity is low. This feeding  
188 behaviour, which lowers trait-based selectivity, imposes several disadvantages on consumers.  
189 As smaller prey are more abundant, consumers miss out on larger and thus energetically more  
190 rewarding resources while handling smaller prey. Indeed, our analyses reveal that consumers  
191 miss these larger prey, as we observed a very weak and negative temperature effect on the  
192 width of consumer trophic niches (SI IV). This suggests that the increased consumption of  
193 smaller prey in warmer environments happens at the cost of missing out on larger prey, which  
194 can be critical to satisfying the energetic needs of consumer species<sup>37</sup>. This observation tends  
195 to mitigate our assumption that adaptive behaviour leading to more neutral-driven consumption  
196 should increase species coexistence in the face of warming. Indeed, metabolic rates increase  
197 with warming faster than feeding rates, leading to the extinction of top predators due to  
198 starvation<sup>31,38,39</sup>. This starvation effect explained by physiological process can cumulate with our  
199 observed behavioural response: consuming outside of the most efficient predator-prey body  
200 mass ratio is, in general, associated with a lower energy flux through food webs, which may limit



201 the coexistence of consumer species<sup>37,40</sup>. The combination of direct and indirect effects of  
202 warming could increase the likelihood of extinction of top predators in food webs, which are  
203 usually considered key species for the maintenance of biodiversity and ecosystem  
204 functionality<sup>41</sup>.

205

## 206 **Consequences for species coexistence under global warming**

207

208 Adaptive foraging in response to varying local conditions is often considered to foster species  
209 coexistence<sup>25,26,42</sup>. The general assumption behind this conclusion is that consumer species will  
210 adapt their foraging strategies in order to maximise their energetic gains<sup>43</sup>. However, our results,  
211 based on an allometric framework, suggest that consumers tend to depart from this optimal  
212 behaviour under stressful conditions. We explored the consequences of this behaviour using a  
213 population dynamic model that predicts the temporal dynamics and coexistence of species in  
214 food webs. The model was parameterized with species body masses and temperature (see  
215 Methods). We ran two versions of this model: one including adaptation of species diets to local  
216 temperature and productivity conditions as informed by our empirical results, and one without  
217 this adaptation, corresponding to the classical modelling approach<sup>44</sup>. We simulated the  
218 dynamics for synthetic food webs of 50 species (30 consumers and 20 basal species) over a  
219 temperature gradient spanning from 1°C to 25°C to predict the number of extinctions at different  
220 temperatures. Overall, we observed that models incorporating adaptive foraging were more  
221 sensitive to warming (Fig. 4), as for models without behavioural adaptation the proportion of  
222 extinct species remained low over a larger temperature gradient. These results were not  
223 affected by the choice of specific values for ecosystem nutrient availability or the functional  
224 response type that are free parameters of our model (SI V)

225

226



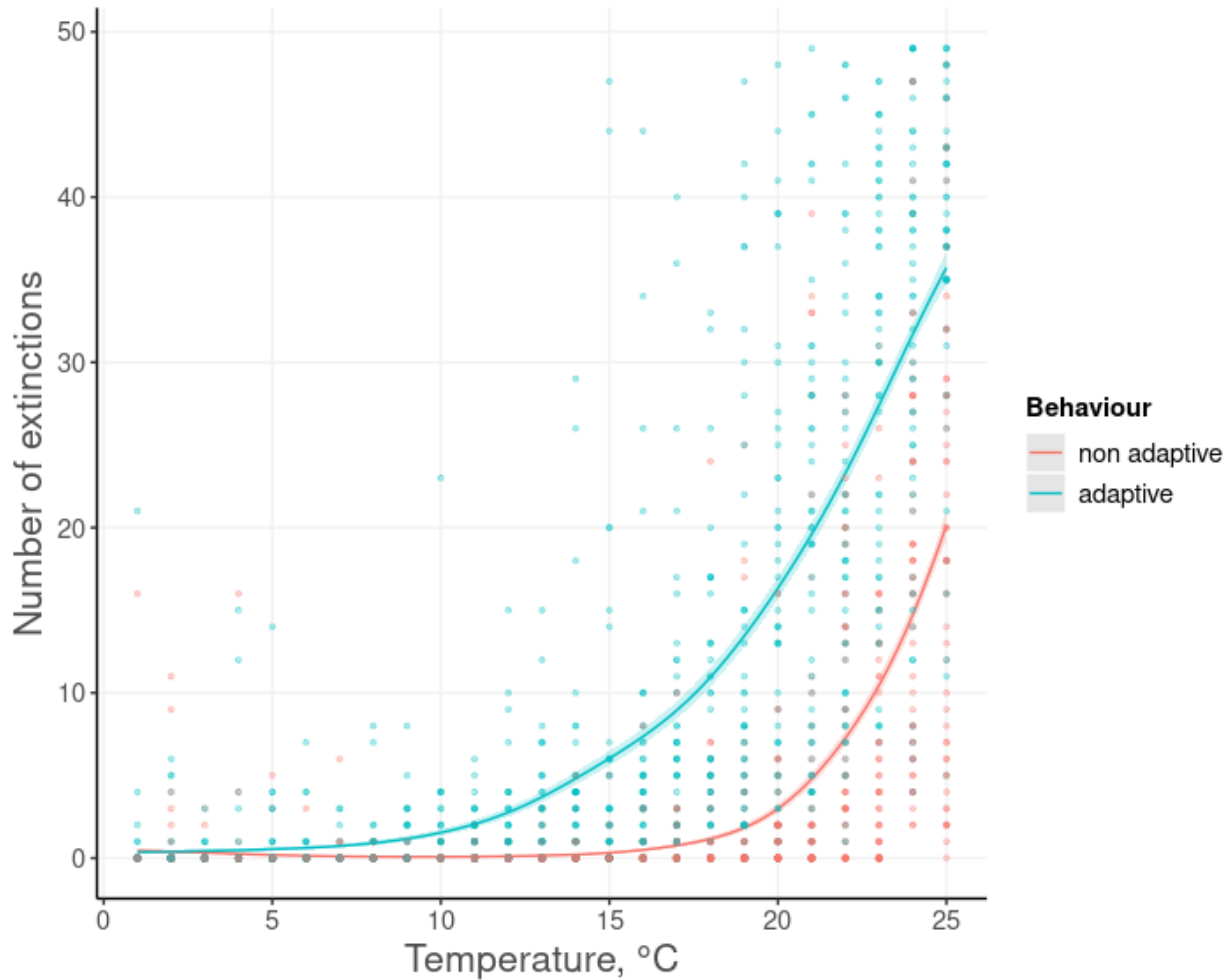

227

228 Fig. 4: Number of species extinctions predicted by the model at different temperatures. The blue line  
229 represents the model output with adaptation of species' diet to local temperature and productivity  
230 conditions was considered, the red line shows extinctions without allowing for this adaptation. The shaded  
231 areas show the 95% confidence interval on the predicted values. Predictions were estimated using a  
232 GAM (REML method) with a binomial link function.

233

234 The effects of warming on the trait structure of communities<sup>8</sup> and the distribution of trophic  
235 interactions<sup>7</sup> are well documented, but a framework for integrating changes in feeding  
236 behaviour with a general modelling approach has been lacking. Our results stress the  
237 importance of accounting for foraging behaviour to better understand and predict community  
238 responses to climate change and challenge previous conclusions on this topic. Indeed, the  
239 discrepancies between the models with and without adaptive foraging suggest that the classical  
240 approach, which only accounts for changes in species physiology<sup>10,12</sup>, may have overlooked a  
241 significant portion of species responses to warming. Importantly, our results show that, contrary

242 to common expectation, behavioural adaptations in response to climatic stress reduce the  
243 likelihood of species coexistence and community biodiversity.

244

## 245 **Future directions**

246

247 The similarity in responses between the two feeding strategies (sit-and-wait and active foraging)  
248 of our consumer species indicates some generality of our results, but it is now important to  
249 further generalize our results across a wider range of species and ecosystem types. For  
250 instance, metabolic type has an important effect on the response of species to temperature<sup>45</sup>  
251 and endotherms could respond differently to ectotherms such as fish.

252 Generally, food web models incorporating foraging behaviour are based on optimal foraging  
253 theory and thus miss a data-driven description of how consumers' diet selectivity changes in a  
254 natural context. To address this, we developed a trait-based framework to document the  
255 response of foraging behaviour to temperature that can be incorporated into predictive food web  
256 models and allowing us to derive predictions on species coexistence. Our approach can be  
257 generalised to other ecological variables that affect food webs and foraging behaviour, such as  
258 fear of predators<sup>30</sup> or habitat complexity<sup>46</sup> for instance. Finally, the effects documented here  
259 come from data sampled at rather low temperatures and levels of productivity. Therefore, it is  
260 crucial to extend our regression models to more productive and warm ecosystems. For  
261 instance, one can argue that very high levels of productivity would balance the energetic stress  
262 related to temperature increase, limiting fish adaptive response to warming in eutrophic  
263 environments.

264

## 265 **Conclusion**

266

267 It is generally assumed that consumers respond to environmental conditions by making optimal  
268 choices maximising their energetic income<sup>26,47,48</sup>. This assumption was used to derive several  
269 predictions in ecology about community structure and species coexistence. For instance, it is  
270 often considered as a solution to May's paradox<sup>49</sup> based on the discrepancy between the  
271 prediction of a mathematical model posing that complex communities should not persist in  
272 nature and empirical observations of ecosystem complexity. It is therefore usually assumed that  
273 species' behaviour is a strong driver of community organisation and supports species  
274 coexistence. We challenge this optimistic view of nature by emphasizing that under stressful  
275 conditions, when resources are scarce and species energetic needs high - for instance when

276 they face energetic stress caused by temperature increase - consumer species tend to depart  
277 from what would be their optimal behaviour under low-stress conditions. Therefore, the  
278 ecological conclusions built into the assumptions that adaptive behaviour favours coexistence  
279 do not necessarily hold in the context of global warming. We tested the consequences of our  
280 observations by integrating this behavioural response in a mechanistic model. We show that the  
281 number of species extinctions in response to an increase in temperature is higher than what is  
282 observed without. This means that the consequences of global warming for species coexistence  
283 might be more severe than predicted by classical ecological models. Our findings also challenge  
284 the general paradigm that adaptive foraging should mitigate the consequences of global  
285 warming for natural ecosystems. Instead, the drastic consequences of climate change indicated  
286 by our results call for a general data-driven theory-approach to forecast of biodiversity and  
287 functioning in future ecosystems.

288

## 289 **Acknowledgements**

290

291 We are profoundly grateful that Wolf E. Arntz collected and provided the valuable data set from  
292 his early work in Kiel Bay that we used in this study. We are also thankful to Astrid Jarre who  
293 digitised the stomach content data, Ute Jacob for her help in the early phase of this project and  
294 Carlos Melian for his friendly review of the manuscript. BG, UB, BR, TB, MJ gratefully  
295 acknowledge the support of iDiv funded by the German Research Foundation (DFG–FZT 118,  
296 202548816). GK acknowledges funding from the German Academic Exchange Service (DAAD,  
297 57070483). MJ acknowledges funding by the European Research Council (ERC) under the  
298 European Union’s Horizon 2020 research and innovation programme (grant agreement no.  
299 677232).

300

## 301 **References**

302

- 303 1. Dell, A. I., Pawar, S. & Savage, V. M. Systematic variation in the temperature  
304 dependence of physiological and ecological traits. *Proc. Natl. Acad. Sci. U. S. A.* **108**,  
305 10591–10596 (2011).
- 306 2. Seebacher, F., White, C. R. & Franklin, C. E. Physiological plasticity increases resilience  
307 of ectothermic animals to climate change. *Nat. Clim. Chang.* **5**, 61–66 (2015).

- 308 3. Yvon-Durocher, G., Jones, J. I., Trimmer, M., Woodward, G. & Montoya, J. M. Warming  
309 alters the metabolic balance of ecosystems. *Philos. Trans. R. Soc. B Biol. Sci.* **365**,  
310 2117–2126 (2010).
- 311 4. Free, C. M. *et al.* Impacts of historical warming on marine fisheries production. *Science*  
312 (80- ). **363**, 979–983 (2019).
- 313 5. Lenoir, J. *et al.* Species better track climate warming in the oceans than on land. *Nat.*  
314 *Ecol. Evol.* **4**, 1044–1059 (2020).
- 315 6. Weinbach, A., Allhoff, K., Thebault, E., Massol, F. & Loeuille, N. Selective effects of  
316 temperature on body mass depend on trophic interactions and network position. *bioRxiv*  
317 233742 (2017) doi:10.1101/233742.
- 318 7. Gibert, J. P. Temperature directly and indirectly influences food web structure. *Sci. Rep.*  
319 **9**, 1–8 (2019).
- 320 8. O’Gorman, E. J. *et al.* A simple model predicts how warming simplifies wild food webs.  
321 *Nature Climate Change* vol. 9 611–616 (2019).
- 322 9. Petchey, O. L., Brose, U. & Rall, B. C. Predicting the effects of temperature on food web  
323 connectance. *Philos. Trans. R. Soc. B Biol. Sci.* **365**, 2081–2091 (2010).
- 324 10. Gauzens, B., Rall, B. C., Mendonça, V., Vinagre, C. & Brose, U. Biodiversity of intertidal  
325 food webs in response to warming across latitudes. *Nat. Clim. Chang.* **10**, 264–269  
326 (2020).
- 327 11. Martinez, N. D. Allometric Trophic Networks From Individuals to Socio-Ecosystems:  
328 Consumer–Resource Theory of the Ecological Elephant in the Room. *Frontiers in*  
329 *Ecology and Evolution* vol. 8 92 (2020).
- 330 12. Binzer, A., Guill, C., Rall, B. C. & Brose, U. Interactive effects of warming, eutrophication  
331 and size structure: Impacts on biodiversity and food-web structure. *Glob. Chang. Biol.* **22**,  
332 220–227 (2016).
- 333 13. Boit, A., Martinez, N. D., Williams, R. J. & Gaedke, U. Mechanistic theory and modelling  
334 of complex food-web dynamics in Lake Constance. *Ecol. Lett.* **15**, 594–602 (2012).
- 335 14. Curtsdotter, A. *et al.* Ecosystem function in predator–prey food webs—confronting  
336 dynamic models with empirical data. *J. Anim. Ecol.* **88**, 196–210 (2019).
- 337 15. Sauve, A. M. C. & Barraquand, F. From winter to summer and back: Lessons from the  
338 parameterization of a seasonal food web model for the Białowieża forest. *J. Anim. Ecol.*  
339 **89**, 1628–1644 (2020).
- 340 16. Rall, B. C. *et al.* Universal temperature and body-mass scaling of feeding rates. *Philos.*  
341 *Trans. R. Soc. B Biol. Sci.* **367**, 2923–2934 (2012).

- 342 17. Gilbert, B. *et al.* A bioenergetic framework for the temperature dependence of trophic  
343 interactions. *Ecol. Lett.* **17**, 902–914 (2014).
- 344 18. Bideault, A. *et al.* Thermal mismatches in biological rates determine trophic control and  
345 biomass distribution under warming. *Glob. Chang. Biol.* **27**, 257–269 (2021).
- 346 19. Abram, P. K., Boivin, G., Moiroux, J. & Brodeur, J. Behavioural effects of temperature on  
347 ectothermic animals: unifying thermal physiology and behavioural plasticity. *Biol. Rev.* **92**,  
348 1859–1876 (2017).
- 349 20. Sentis, A., Gémard, C., Jaugeon, B. & Boukal, D. S. Predator diversity and environmental  
350 change modify the strengths of trophic and nontrophic interactions. *Glob. Chang. Biol.* **23**,  
351 2629–2640 (2017).
- 352 21. Abrams, P. A. Dynamics and Interactions in Food Webs with Adaptive Foragers. in *Food*  
353 *Webs* 113–121 (Springer US, 1996). doi:10.1007/978-1-4615-7007-3\_11.
- 354 22. Abrams, P. & Matsuda, H. Effects of adaptive predatory and anti-predator behaviour in a  
355 two-prey-one-predator system. *Evol. Ecol.* **7**, 312–326 (1993).
- 356 23. Valdovinos, F., Ramos-Jiliberto, R., Garay-Narva´ez, L., Pasquinell, U. & Dunne, J. A.  
357 Consequences of adaptive behaviour for the structure and dynamics of food webs. *Ecol.*  
358 *Lett.* **13**, 1546–1559 (2010).
- 359 24. Kondoh, M. Foraging adaptation and the relationship between food-web complexity and  
360 stability. *Science (80-. )*. **299**, 1388–1391 (2003).
- 361 25. Kondoh, M. Does foraging adaptation create the positive complexity-stability relationship  
362 in realistic food-web structure? *J. Theor. Biol.* **238**, 646–51 (2006).
- 363 26. Kondoh, M. Foraging adaptation and the relationship between food-web complexity and  
364 stability. *Science (80-. )*. **299**, 1388–91 (2003).
- 365 27. Lemoine, N. P., Drews, W. A., Burkepile, D. E. & Parker, J. D. Increased temperature  
366 alters feeding behavior of a generalist herbivore. *Oikos* **122**, 1669–1678 (2013).
- 367 28. Sentis, A., Hemptinne, J. L. & Brodeur, J. Towards a mechanistic understanding of  
368 temperature and enrichment effects on species interaction strength, omnivory and food-  
369 web structure. *Ecol. Lett.* **17**, 785–793 (2014).
- 370 29. Portalier, S. M. J., Fussmann, G. F., Loreau, M. & Cherif, M. The mechanics of predator–  
371 prey interactions: First principles of physics predict predator–prey size ratios. *Funct. Ecol.*  
372 **33**, 323–334 (2019).
- 373 30. Ho, H., Tylilanakis, J. M., Zheng, J. X. & Pawar, S. Predation risk influences food-web  
374 structure by constraining species diet choice. *Ecol. Lett.* **22**, 1734–1745 (2019).
- 375 31. Binzer, A., Guill, C., Brose, U. & Rall, B. C. The dynamics of food chains under climate

- 376 change and nutrient enrichment. *Philos. Trans. R. Soc. B Biol. Sci.* **367**, 2935–2944  
377 (2012).
- 378 32. Gauzens, B., Legendre, S., Lazzaro, X. & Lacroix, G. Intermediate predation pressure  
379 leads to maximal complexity in food webs. *Oikos* **125**, 595–603 (2016).
- 380 33. Tsai, C.-H., Hsieh, C. & Nakazawa, T. Predator-prey mass ratio revisited: Does  
381 preference of relative prey body size depend on individual predator size? *Funct. Ecol.*  
382 (2016) doi:10.1111/1365-2435.12680.
- 383 34. Brose, U. *et al.* Predator traits determine food-web architecture across ecosystems. *Nat.*  
384 *Ecol. Evol.* **3**, 919–927 (2019).
- 385 35. Elmgren, R. & Hill, C. Ecosystem function at low biodiversity – the Baltic example. in  
386 *Marine Biodiversity* 319–336 (Cambridge University Press, 2010).  
387 doi:10.1017/cbo9780511752360.015.
- 388 36. Elmgren, R. Man’s impact on the ecosystem of the Baltic Sea: Energy flows today and at  
389 the turn of the century. *Ambio* **18**, 326–332 (1989).
- 390 37. Brose, U. Body-mass constraints on foraging behaviour determine population and food-  
391 web dynamics. *Funct. Ecol.* **24**, 28–34 (2010).
- 392 38. Petchey, O. L., McPhearson, P. T., Casey, T. M. & Morin, P. J. Environmental warming  
393 alters food-web structure and ecosystem function. *Nature* **402**, 69–72 (1999).
- 394 39. Vucic-Pestic, O., Ehnes, R. B., Rall, B. C. & Brose, U. Warming up the system: Higher  
395 predator feeding rates but lower energetic efficiencies. *Glob. Chang. Biol.* **17**, 1301–1310  
396 (2011).
- 397 40. Guzman, L. M. & Srivastava, D. S. Prey body mass and richness underlie the persistence  
398 of a top predator. *Proc. R. Soc. B Biol. Sci.* **286**, (2019).
- 399 41. Birkeland, C. & Dayton, P. K. The importance in fishery management of leaving the big  
400 ones. *Trends in Ecology and Evolution* vol. 20 356–358 (2005).
- 401 42. Stump, S. M. & Chesson, P. How optimally foraging predators promote prey coexistence  
402 in a variable environment. *Theor. Popul. Biol.* **114**, 40–58 (2017).
- 403 43. Pyke, G. H., Pulliam, H. R. & Charnov, E. L. Optimal Foraging: A Selective Review of  
404 Theory and Tests. *Q. Rev. Biol.* **52**, 137–154 (1977).
- 405 44. Schneider, F. D., Brose, U., Rall, B. C. & Guill, C. Animal diversity and ecosystem  
406 functioning in dynamic food webs. *Nat. Commun.* **7**, 1–8 (2016).
- 407 45. Pinsky, M. L., Eikeset, A. M., McCauley, D. J., Payne, J. L. & Sunday, J. M. Greater  
408 vulnerability to warming of marine versus terrestrial ectotherms. *Nature* **569**, 108–111  
409 (2019).



- 410 46. Jinks, K. I. *et al.* Habitat complexity influences the structure of food webs in Great Barrier  
411 Reef seagrass meadows. *Ecosphere* **10**, e02928 (2019).
- 412 47. Beckerman, A. P., Petchey, O. L. & Warren, P. H. Foraging biology predicts food web  
413 complexity. *Proc. Natl. Acad. Sci. U. S. A.* **103**, 13745–9 (2006).
- 414 48. Petchey, O. L., Beckerman, A. P., Riede, J. O. & Warren, P. H. Size, foraging, and food  
415 web structure. *Proc. Natl. Acad. Sci. U. S. A.* **105**, 4191–4196 (2008).
- 416 49. May, R. M. Qualitative Stability in Model Ecosystems. *Ecology* **54**, 638–641 (1973).
- 417 50. Russo, T., Costa, C. & Cataudella, S. Correspondence between shape and feeding habit  
418 changes throughout ontogeny of gilthead sea bream *Sparus aurata* L., 1758. *J. Fish Biol.*  
419 **71**, 629–656 (2007).
- 420 51. Arntz, W. E. Die Nahrung juveniler Dorsche (*Gadus morhua* L.) in der Kieler Bucht. in  
421 *Berichte der Deutschen wissenschaftlichen Kommission für Meeresforschung* 129–183  
422 (1974).
- 423 52. Lie, U. & Pamatmat, M. M. digging characteristics and sampling efficiency of the 0.1 m<sup>2</sup>  
424 van veen grab. *Limnol. Oceanogr.* **10**, 379–384 (1965).
- 425 53. Gröger, J. & Rumohr, H. Modelling and forecasting long-term dynamics of Western Baltic  
426 macrobenthic fauna in relation to climate signals and environmental change. *J. Sea Res.*  
427 **55**, 266–277 (2006).
- 428 54. Stan Development Team. RStan: the R interface to Stan. (2020).
- 429 55. Azzalini, A. The R package sn: The Skew-Normal and Related Distributions such as the  
430 Skew-t and the SUN (version 2.0.0). (2021).
- 431 56. Jobling, M. Mythical models of gastric emptying and implications for food consumption  
432 studies. *Environ. Biol. Fishes* **16**, 35–50 (1986).
- 433 57. Yodzis, P. & Innes, S. Body Size and Consumer-Resource Dynamics. *Am. Nat.* **139**,  
434 1151–1175 (1992).
- 435 58. Lang, B., Ehnes, R. B., Brose, U. & Rall, B. C. Temperature and consumer type  
436 dependencies of energy flows in natural communities. *Oikos* **126**, 1717–1725 (2017).
- 437 59. Hirt, M. R., Lauermaun, T., Brose, U., Noldus, L. P. J. J. & Dell, A. I. The little things that  
438 run: a general scaling of invertebrate exploratory speed with body mass. *Ecology* **98**,  
439 2751–2757 (2017).
- 440 60. Delmas, E., Brose, U., Gravel, D., Stouffer, D. B. & Poisot, T. Simulations of biomass  
441 dynamics in community food webs. *Methods Ecol. Evol.* **8**, 881–886 (2017).
- 442
- 443



## 444 **Supplementary information I Methods**

445

### 446 **The Kiel Bay database**

447

448 The Kiel Bay is located in the Baltic Sea, which is a marginal sea connected to the North  
449 Atlantic and considered the largest brackish sea in the world. It is a rather low productivity  
450 ecosystem with low biodiversity due to its glacial history and the strong salinity gradients that  
451 only few species can tolerate<sup>35,36</sup>. The core of the Kiel Bay database comprises detailed diet  
452 information based on stomach contents from 22185 fish individuals of six species from the Kiel  
453 Bay. These species were classified into two functional groups based on their body shape and  
454 habitat use: fusiform and benthopelagic species (*Gadus morhua*, *Merlangius merlangius*) versus  
455 flat and demersal species (*Limanda limanda*, *Pleuronectes platessa*, *Platichthys flesus*, and  
456 *Hippoglossoides platessoides*). This shape characteristic also corresponds to specific foraging  
457 behaviour<sup>50</sup>.

458 The fish individuals were sampled using systematic and standardised bottom trawls. The trawls  
459 were carried out year-round between 1968 and 1978. The body lengths of fish were measured  
460 and rounded to the nearest integer (in cm). Species-specific regressions were used to estimate  
461 fish body masses. Stomach contents were identified to the highest taxonomic resolution  
462 possible and wet mass determined when possible. Hence, the database includes body size data  
463 for all fish (i.e. predators) but also for prey items from the stomach contents<sup>51</sup>. In addition, we  
464 were able to add independently-sampled abundance and body mass information on the benthic  
465 invertebrate (i.e. prey) fauna to the database. These data on prey abundances and body  
466 masses were sampled independently at the trawling locations using classical 0.1 m<sup>2</sup> van Veen  
467 grabs<sup>52</sup>, see<sup>53</sup> for detailed procedure. We have enriched the database with climatic (i.e.  
468 temperature) and oceanographic (i.e. salinity) data and geographical information on the  
469 distances between the sampling (trawling) sites. So far, the stomach content data have been  
470 published only partially and in German language<sup>51</sup> while parts of the invertebrate abundance  
471 data were treated and published separately<sup>53</sup>. The food web mainly consists of six demersal fish  
472 species and more than a dozen benthic invertebrate species from different groups (see Table SI  
473 VI 3).

474

### 475 **Filtering data**

476

477 To make comparisons between the distributions of prey observed in fish stomachs and the ones  
478 observed in the environment, we only used a subset of the database for which we were able to  
479 (i) associate information about a fish to information about its environment and (ii) have a body  
480 mass estimate of prey found in the stomach. We considered this association between fish and  
481 environment possible, when they were sampled in the same area and within less than 31 days.  
482 This first filter reduced the number of fish used in our analysis to 2,487.  
483 On this subset, we considered a unique statistical individual (hereafter called statistical fish) all  
484 individuals from the same functional group, occurring at the same place, on the same date with  
485 the same body mass. This choice is led by the allometric approach used in our analysis, where  
486 all individuals from the same species and with the same body mass are considered identical.  
487 This aggregation increases the quality of the estimation of the prey body mass distribution in  
488 stomachs at the cost of a lower statistical power for the analyses done on the shape of these  
489 distributions. For instance, with a high aggregation level, fewer data points are available to  
490 consider the effect of temperature on the average body mass of prey. This approach is therefore  
491 conservative as it reduces the probability of type 1 error. Lastly, we found that few fishes were  
492 mostly feeding on species that were not detected in the environment, suggesting that the  
493 information on the environment was not a good descriptor of available resources. When less  
494 than 90% of the prey biomass found in guts was explained by what was found in the  
495 environment, the fish were discarded (26 cases) Finally, we obtained a final dataset of 290  
496 statistical fish. For our statistical analysis we used fish shape as a covariate instead of fish  
497 species. As some species were specific to some temperature or body mass gradients, the  
498 species-specific slopes obtained would be meaningless. This question only holds for the  
499 analysis about the fish stomach contents. For the analysis of preferences, fish shape or fish  
500 species covariate were anyway removed by our AIC criterion.  
501 Different factors affect prey retention time in consumers' guts. Temperature is certainly essential  
502 but we assume that its impact was the same for all consumers introducing a constant bias with  
503 no effect on the trends we observed. However, a more species-specific factor relating to species  
504 morphology, like the presence of shells or skeletons, could impact our results. We thus  
505 compared two sets of results, one for which we incorporated in the model a lower detection  
506 probability for species with hard bodies (presented here), and one for which we did not (SI VI).  
507 Overall, the trends and effects observed when including this correction were similar to those  
508 observed without correction, thus suggesting an absence of systematic biases.  
509  
510

## 511 Fitting of gut content and environmental distributions

512

513 We used a Bayesian approach to fit realised and environmental distributions. For the  
514 environment distributions, we fitted skew normal distributions to the observed body masses  $y$ ,  
515 with environment  $ID$  as a random effect. A skew normal distribution is defined by parameters for  
516 location  $\xi$ , scale  $\omega$  and shape  $\alpha$ . Its probability density function reads

$$517 \quad p(y|\xi, \omega, \alpha) = \frac{1}{\omega\sqrt{2\pi}} \exp\left(\frac{-(y - \xi)^2}{2\omega^2}\right) \left(1 + \operatorname{erf}\left(\alpha \frac{y - \xi}{\omega\sqrt{2}}\right)\right)$$

518 where erf is the Gaussian error function<sup>54,55</sup>. For  $\alpha=0$ , this reduces to the non-skewed normal  
519 distribution with mean  $\mu=\xi$  and standard deviation  $\sigma=\omega$ . For  $\alpha>0$  or  $\alpha<0$ , the distribution is  
520 positively or negatively skewed, where skew  $\gamma(\alpha)$ , standard deviation  $\sigma(\omega, \alpha)$  and mean  $\mu(\xi, \omega, \alpha)$   
521 are given as functions of location, scale and shape parameters<sup>55</sup>.

522 The statistical model then is defined by an observed body mass  $y$  of a prey individual  $i$  in  
523 environment  $ID(i)$  being distributed as

$$524 \quad y_{i,ID} \text{ skewnormal}(\xi_{ID}, \omega_{ID}, \alpha_{ID})$$

525 ( $i=1, \dots, N, ID=1, \dots, M$ ). Using a hierarchical / partial pooling approach, we assume the individual  
526 parameters have a joint multivariate normal distribution

$$527 \quad (\xi_{ID}, \omega_{ID}, \alpha_{ID}) \text{ multivariatenormal}((\xi, \omega, \alpha), \Sigma)$$

528 ( $ID=1, \dots, M$ ). The joint mean parameters  $\xi, \omega, \alpha$  and the 3x3 covariance matrix  $\Sigma$  are estimated  
529 during the model fitting approach. We used weakly informative priors for all model parameters.  
530 Samples from the posterior distribution were drawn using Hamiltonian Monte Carlo in Stan<sup>54</sup>  
531 and posterior medians were used as point estimates of  $(\xi_{ID}, \omega_{ID}, \alpha_{ID})$  for the subsequent  
532 analyses. The realised distributions were fitted analogously, using predator identity as a random  
533 effect. We however included here a correction factor to consider that the probability of detection  
534 of prey in guts relates to their body characteristic<sup>56</sup> (presence or absence of hard body parts like  
535 shells or skeleton). We assumed that prey with hard body parts are more likely to be detected in  
536 comparison to species composed of soft tissues only because of higher digestion time and  
537 corrected their biomass by multiplying it by 0.8. The results found without this correction were  
538 similar to the ones observed without (SI VI).

539

## 540 Determining allometric species' preferences

541

542 The preference distributions of each statistical fish were estimated as the departure of  
543 the realised niche from the environmental distribution. We removed the effect of species  
544 environmental availability from the realised to define the preference distribution as:

$$545 \quad P = \frac{R}{E},$$

546 where  $P$ ,  $R$  and  $E$  represent the preference, realised and environmental distributions,  
547 respectively. By doing so, we assumed that a feeding event is defined by two independent  
548 probabilities: the probability for a consumer to encounter a prey (defined by the  $R$  distribution)  
549 and of the probability for a consumer to consume the prey when encountered (given by the  
550 preference distribution). To assess changes in the distributions and how they depart from each  
551 other, we used variations in the point estimates (median and standard deviation). This limited  
552 the amount of information used in our study. Quantifying the neutral versus trait-based  
553 processes would benefit from the comparison between the environmental and realised  
554 distributions using metrics like the Kullback-Leibler divergence. With such an approach, one  
555 could argue that the more divergent the distributions are, the more predation events are driven  
556 by traits. However, this would be limited by the impossibility of disentangling the part of the  
557 divergences explained by changes in the environmental distribution and what relates to a  
558 change in fish behaviour. However, we believe that a more controlled approach in micro- or  
559 mesocosms where the body mass distribution of prey species available could be standardised  
560 could elegantly solve this issue.

561

## 562 **Dynamic model**

563

564 To simulate the population dynamics, we used a previously published model<sup>44</sup>, based on the  
565 Yodzis and Innes framework<sup>57</sup>. The growth of consumer species  $B_i$  is determined by the  
566 balance between its energetic income (predation) and its energetic losses (predation  
567 metabolism)

568

$$569 \quad \frac{dB_i}{dt} = e_p B_i \sum_j F_{ij} + e_a B_i \sum_j F_{ij} - \sum_j B_i F_{ji} - x_i B_i,$$

570 where  $e_p = 0.545$  and  $e_a = 0.906$  represent the assimilation efficiency of a consumer foraging on  
571 plants and animals, respectively<sup>58</sup>.  $x_i$  defines the metabolic rate of species  $i$ , which scales  
572 allometrically with body mass:

$$573 \quad x_i = x_0 m_i^{-0.25} e^{E x \frac{T_0 - T}{k T_0 T}},$$

574 where  $x_0 = 0.314$  is the scaling constant <sup>44</sup>,  $E_x = -0.69$  is the activation energy of metabolic rate  
 575 (Binzer et al. 2015),  $k$  the Boltzmann constant,  $T_0 = 293.15$  the reference temperature in Kelvin  
 576 and  $T$  the temperature at which the simulation is performed. The trophic interactions are  
 577 determined using a functional response  $F_{ij}$  that describes the feeding rate of consumer  $i$  over  
 578 resource  $j$ :

$$579 \quad F_{ij} = \frac{\omega_{ij} b_{ij} B_j^{1+q}}{1 + c B_i + \omega_{ij} \sum_k h_{ij} b_{ik} B_k^{1+q}} \cdot \frac{1}{m_x}.$$

580  
 581  $b_{ij}$  represent the species-specific capture and is determined by predator and prey body masses:

$$582 \quad b_{ij} = P_{ij} L_{xz}.$$

583 It corresponds to the product of encounter probabilities  $P_{ij}$  by the probability that an encounter  
 584 leads to a realised predation event  $L_{ij}$ . Both quantities are determined by species body masses.  
 585 We assume that encounter probability is more likely for species with higher movement speeds  
 586 of both consumer and resource species:

$$587 \quad P_{ij} = p_0 m_i^{\beta_i} m_j^{\beta_j} e^{E_p \frac{T_0 - T}{k T_0 T}}.$$

588 Since movement speed scales allometrically and based on feeding type <sup>59</sup>, we drew  $\beta_x$  and  $\beta_z$   
 589 from according normal distributions (carnivore:  $\mu_\beta = 0.42$ ,  $\sigma_\beta = 0.05$ , omnivore:  $\mu_\beta = 0.19$ ,  $\sigma_\beta =$   
 590  $0.04$ , herbivore:  $\mu_\beta = 0.19$ ,  $\sigma_\beta = 0.04$ , primary producer:  $\mu_\beta = 0$ ,  $\sigma_\beta = 0$ ). Activation energy  $E_p$  is  
 591 equal to  $-0.38$  (Binzer et al. 2015).  $L_{ij}$  is assumed to follow a Ricker curve (Schneider et al.  
 592 2016), defined as:

$$593 \quad L_{xz} = \left( \frac{m_x}{m_z R_{opt}} e^{1 - \frac{m_x}{m_z R_{opt}}} \right)^Y,$$

594 where the optimal consumer-resource body mass ratio  $R_{opt} = 47.9$  was calculated from the  
 595 observed realised interactions in our dataset. We used a threshold  $L_{ij} < 0.01$  under which values  
 596 were set to 0, assuming that too small or too large prey are not considered by consumers. The  
 597 handling time  $h_{ij}$  of  $i$  on  $j$  is defined as:

$$598 \quad h_{ij} = h_0 m_i^{\eta_i} m_j^{\eta_j} e^{E_h \frac{T_0 - T}{k T_0 T}},$$

599 where the scaling constant  $h_0$  was set to 0.4 and the allometric coefficients for  $\eta_i$  and  $\eta_j$  where  
 600 drawn from a normal distribution with mean and standard deviation of  $-0.48$  and  $0.03$  for  $\eta_i$  and  
 601 of  $-0.66$  and  $0.02$  for  $\eta_j$ .  $E_h$  is equal to  $0.26$ . The term  $w_{ij}$  informs on species selectivity<sup>60</sup>. For the  
 602 models without behavioural expectations we used the classical parametrisation and defined it  
 603 for every  $j$  as 1 over the number of prey of consumer  $i$ . When adaptive behaviour was included

604 in the model, the value was determined by the predictions of the skewed normal distribution we  
605 fitted on our dataset. These were informed by the consumer and resource body masses, at  
606 given levels of productivity and temperature. To maintain the comparability with the model  
607 without adaptive behaviour, the  $w_{ij}$  values were normalised to 1 for each consumer. As for our  
608 experimental data, productivity was defined as the total biomass of prey available for each  
609 consumer. As this value can be highly variable during the simulations, especially in the transient  
610 dynamics, we rescaled this value between 0 and 4 to maintain it to a scale that is similar to the  
611 one from our dataset that we used to inform the skew normal distributions

612 The biomass dynamic of the basal species  $i$  is defined as:

$$613 \frac{dB_i}{dt} = r_i G_i B_i - \sum_j B_j F_{ji} - x_i B_i,$$

614 where  $r_i = m_i^{-0.25}$  defines the species growth rate.  $G_i$  is the species-specific growth factor,  
615 determined by the concentration of two nutrients  $N_1$  and  $N_2$ :

$$616 G_i = \min\left(\frac{N_1}{K_{i1} + N_1}, \frac{N_2}{K_{i2} + N_2}\right),$$

617 Where  $K_{i\ell}$  determines the half saturation density of plant  $i$  nutrient uptake rate. It is determined  
618 randomly from a uniform distribution in  $[0.1, 0.2]$ . The dynamic of the nutrient concentrations is  
619 defined by:

$$620 \frac{dN_\ell}{dt} = D(S_\ell - N_\ell) - v_\ell \sum_i r_i G_i P_i,$$

621 Where  $D = 0.25$  determines the nutrients turnover rate and  $S_\ell = 5$  determines the maximal  
622 nutrient level. The loss of a specific nutrient  $\ell$  is limited by its relative content in the plant  
623 "'species' biomass ( $v_1=1$ ,  $v_2=0.5$ ).

624 We ran our model on food webs of 50 species, composed of 30 consumers and 20 basal  
625 species. A link was drawn between two species  $i$  and  $j$  when  $L_{ij} > 0$ . For each temperature we  
626 ran 50 replicates of the two model's versions (with and without adaptive behaviour) and  
627 recorded the number of extinctions. We fitted a GAM model on this number of extinctions  
628

## 629 **Supplementary information II: Environmental characteristics**

630

631 Overall, the different environments considered were characterised by two contrasted levels of  
632 productivity, leading to a bimodal distribution.

633

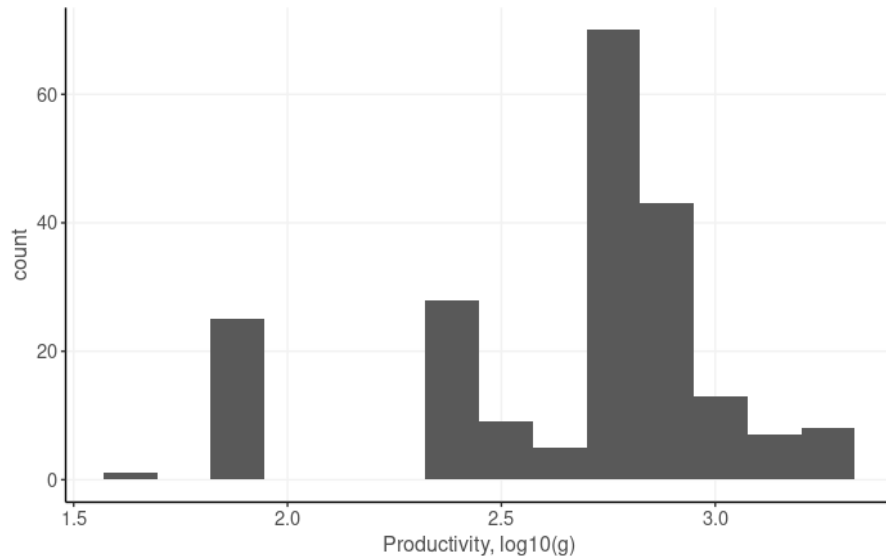

634

635 Fig. SI 2.1: distribution of the productivity values (g) for the different environments

636

637

638 Associated to these differences, we observed that the body mass distribution of the basal  
639 species (median and standard deviation) was responding differently to temperature depending  
640 on productivity values (Figure SI 2.2, Table SI 2.1):

641



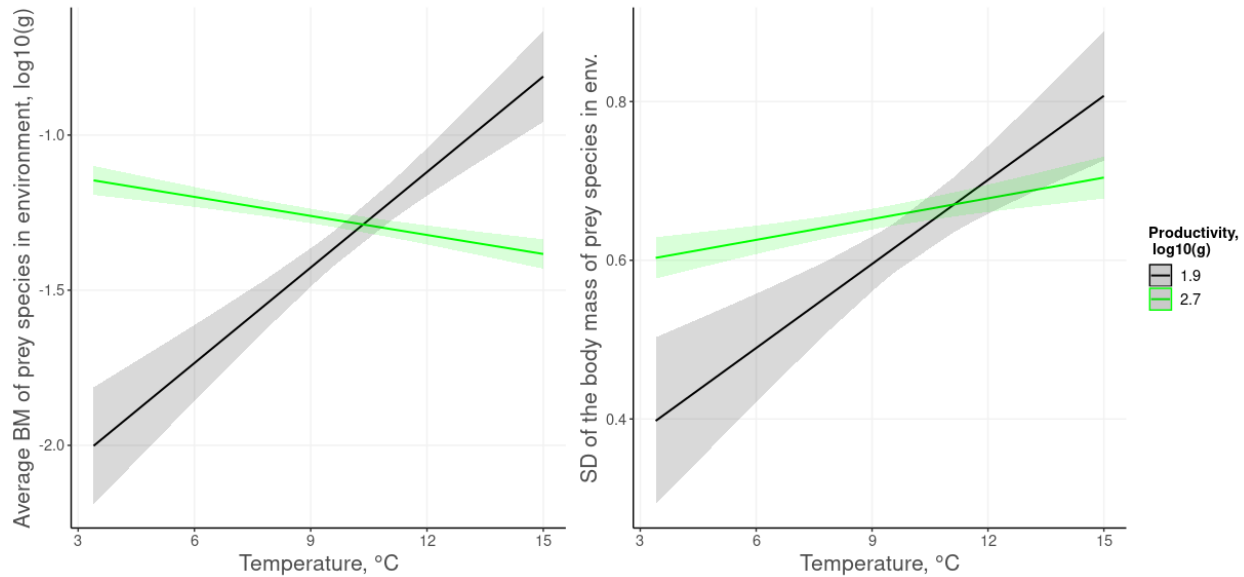

642

643 Fig. SI 2.2: response of the body mass structure of the resource species to temperature and  
 644 productivity  
 645

646

Table SI 2.1: model estimate for the prediction of median and standard deviation of the environment distributions

| Predictors                               | Median of BM  |               |        |               | Standard deviation of BM |        |  |
|------------------------------------------|---------------|---------------|--------|---------------|--------------------------|--------|--|
|                                          | Estimates     | CI            | p      | Estimates     | CI                       | p      |  |
| (Intercept)                              | -5.38         | -6.32 – -4.43 | <0.001 | -0.43         | -0.95 – 0.10             | 0.113  |  |
| Productivity                             | 1.59          | 1.24 – 1.94   | <0.001 | 0.37          | 0.17 – 0.57              | <0.001 |  |
| Temperature                              | 0.39          | 0.30 – 0.49   | <0.001 | 0.10          | 0.05 – 0.15              | <0.001 |  |
| productivity:temperature                 | -0.15         | -0.19 – -0.12 | <0.001 | -0.03         | -0.05 – -0.01            | 0.001  |  |
| Observations                             | 223           |               |        | 223           |                          |        |  |
| R <sup>2</sup> / R <sup>2</sup> adjusted | 0.306 / 0.297 |               |        | 0.160 / 0.148 |                          |        |  |

647

648

649

650 **Supplementary information III: response of the preferred distribution**  
651 **to temperature at different levels of productivity**

652

653 As we observed a strong interaction effect between temperature and productivity when  
654 explaining the response of the median of the body mass distributions in our different  
655 environments, we estimated for which levels of productivity the relationship between  
656 temperature and median was significant. At low productivity, we observed a positive slope  
657 between the median and temperature albeit not significant. The slope of the regression linearly  
658 decreased with productivity value, and became significantly lower than 0 for productivity levels  
659 larger than  $10^{2.52}$ .

660

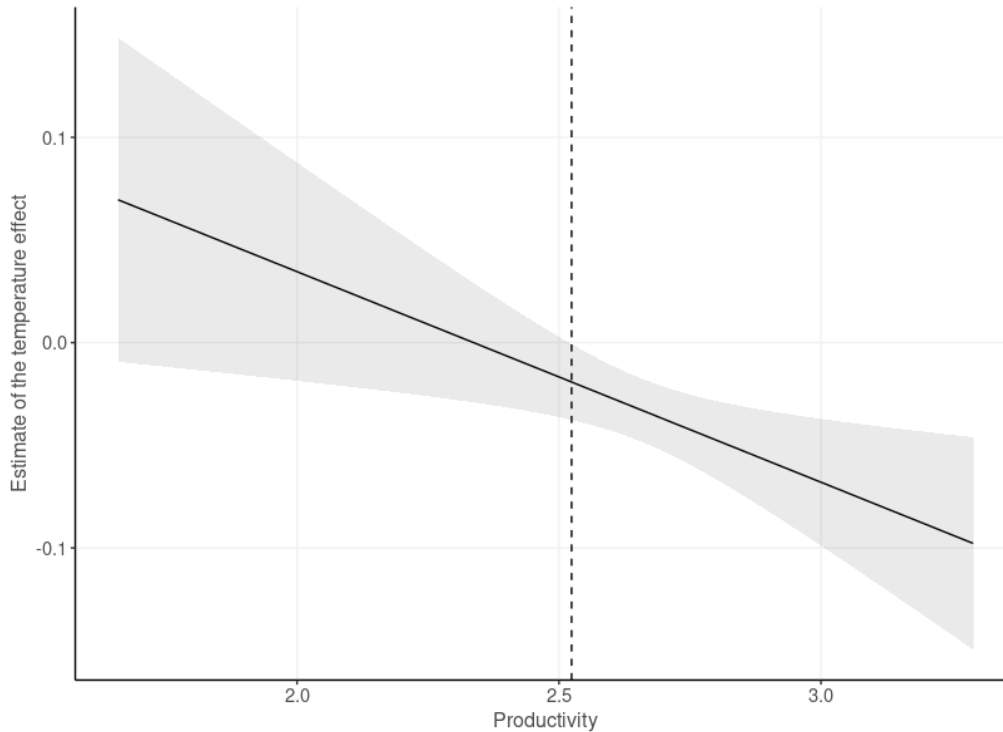

661

662 Fig. SI 3.1: Estimate and CI for the temperature effect at different levels of productivity. the  
663 dashed line indicates the productivity value above which the temperature effect become  
664 significant

665

666

667 **Supplementary information IV: response of the width of the preferred**  
668 **trophic niche to local conditions**

669

670 To assess how the width of the preferred niche responded to environmental conditions we fitted  
671 the same models as for the median on the standard deviation of the body mass of the preferred  
672 distribution. We observed that the standard deviation was decreasing with the predator body  
673 mass and with temperature. We however detected an interaction between fish shape and  
674 productivity. At low productivity levels the width of the trophic niche of fusiform fish tended to be  
675 larger than the one of flat fish while the opposite is observed at higher productivity levels.

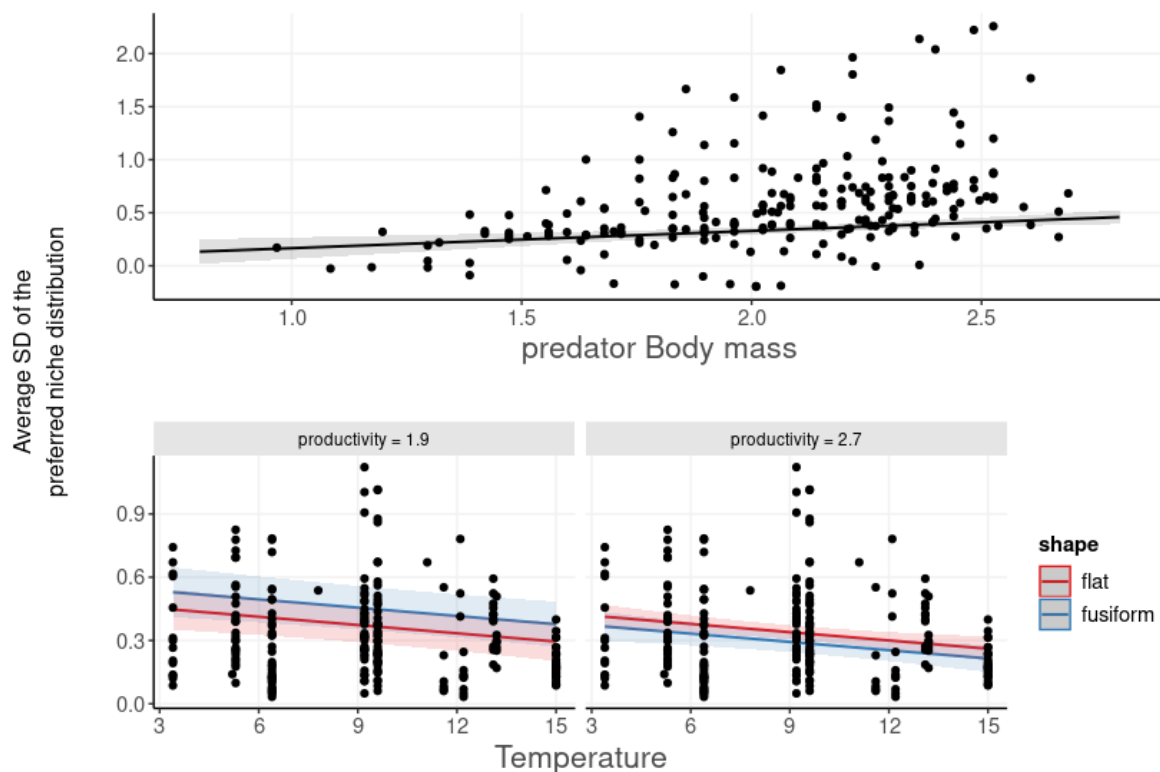

676

677 Fig. SI 4.1: Response of the width (standard deviation) of the preferred distribution to predator  
678 body mass (a) and temperature for different productivity gradients (b,c). Colours define the fish  
679 shape.

680

681 *Table SI 4.1: model estimates for the prediction of the standard deviation of the preference distributions*

| <i>Predictors</i>                        | <b>sd of the preference distribution</b> |                 |                  |
|------------------------------------------|------------------------------------------|-----------------|------------------|
|                                          | <i>Estimates</i>                         | <i>CI</i>       | <i>p</i>         |
| (Intercept)                              | 0.238                                    | -0.075 – 0.551  | 0.135            |
| Predator body mass                       | 0.163                                    | 0.078 – 0.247   | <b>&lt;0.001</b> |
| Productivity                             | -0.043                                   | -0.139 – 0.054  | 0.384            |
| shapefusiform                            | 0.387                                    | -0.027 – 0.802  | 0.067            |
| Temperature                              | -0.013                                   | -0.021 – -0.005 | <b>0.001</b>     |
| productivity:shapefusiform               | -0.161                                   | -0.314 – -0.007 | <b>0.041</b>     |
| Observations                             | 223                                      |                 |                  |
| R <sup>2</sup> / R <sup>2</sup> adjusted | 0.137 / 0.118                            |                 |                  |

682

683

684

685 **Supplementary information V: Effect of nutrient availability and**  
686 **predators' functional responses type on predictions about species**  
687 **coexistence.**

688

689 As maximum nutrient availability (variable  $S_i$ ) and shape of the functional response ( $q$ ) are not  
690 empirically informed, we analysed how sensitive to these two parameters model's predictions  
691 are. We varied  $S_i$  from 1 to 240 and  $q$  from 0 to 0.5. Overall, we observed a very limited effect of  
692 nutrient availability on the pattern observed (Fig. SI5.1). The type of the functional response  
693 used resulted in more variations on the number of extinctions observed, but did not altered the  
694 differences observed due to the incorporation of foraging behaviour (Fig. SI5.2).

695

696

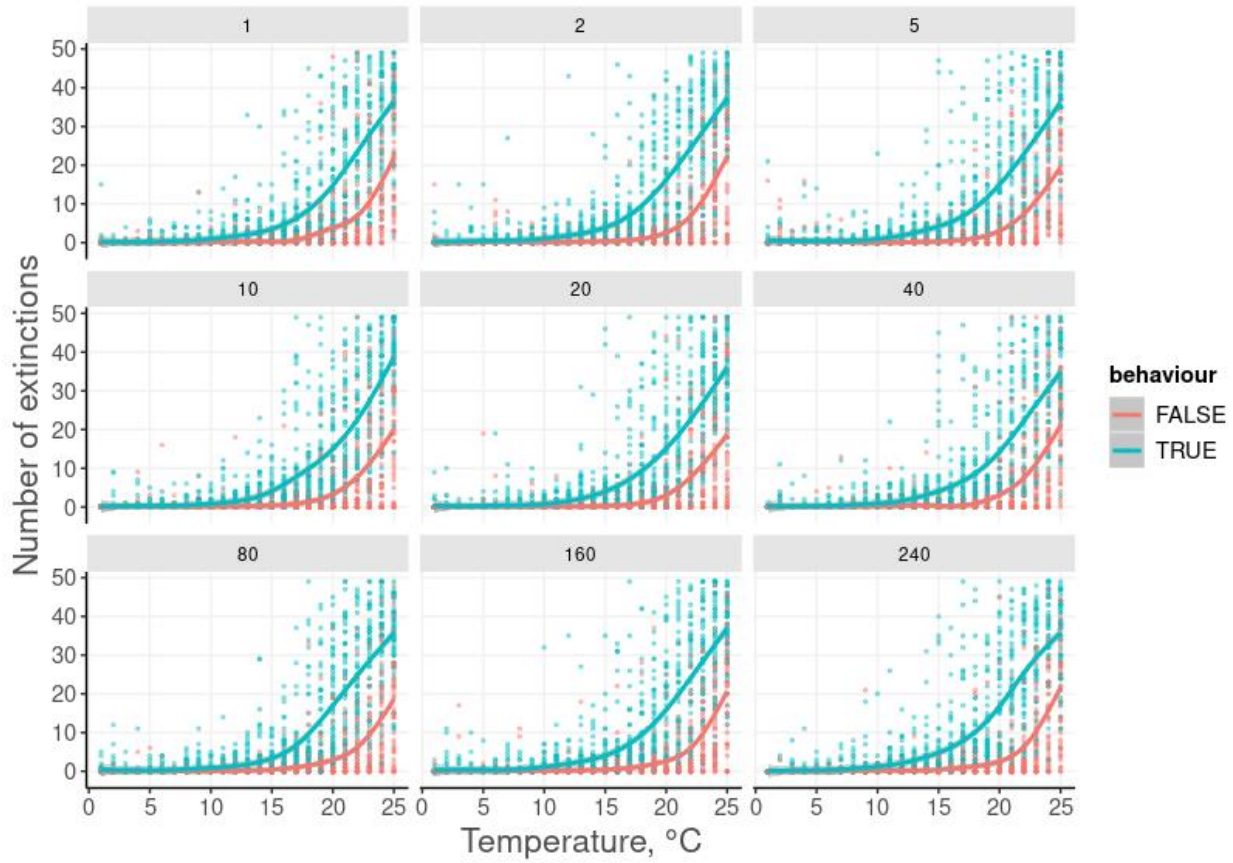

697

698 Figure SI 5.1: Effect of different levels of nutrient availability on the number of extinctions  
699 predicted by the model. Simulations where ran with a hill exponent ( $q$ ) of 0.2

700

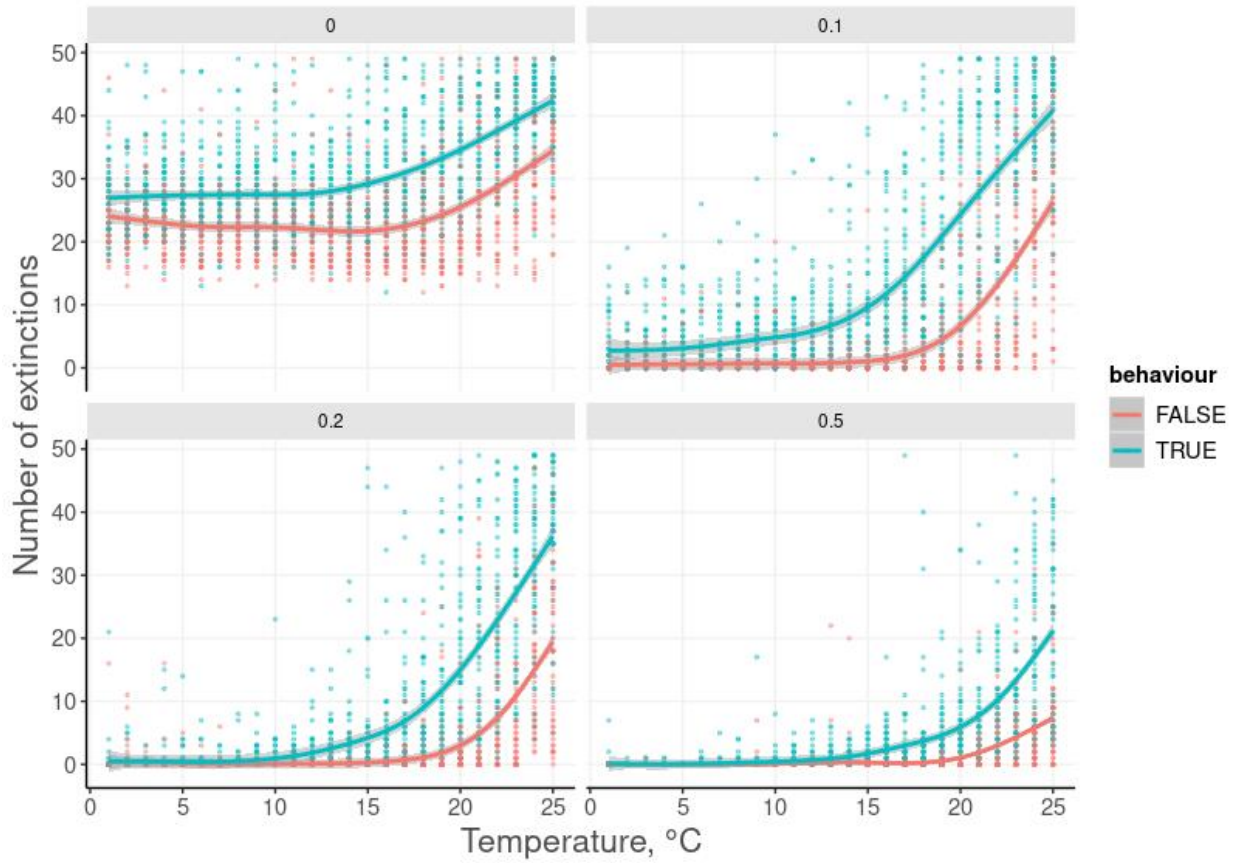

701

702 Figure S15.2: effect of the choice of functional response type on the number of extinctions  
703 predicted by the model. Simulations where ran for a level of maximum nutrient (S) of 5.

704

705



706 **Supplementary information VI: Effect of considering different**  
707 **detection probabilities for prey in stomachs**

708  
709 As prey composed of soft tissues only are supposed to be less likely to be detected because of  
710 a faster digestion time, we corrected our observation by multiplying the abundance of species  
711 with hard body parts by 0.8. This was done to mirror the importance of these species that  
712 should persist longer in stomachs. As we are missing a general framework to properly describe  
713 how digestion time changes for the different species we used a unique correction factor that is a  
714 free parameter in our model (prey are either easy or difficult to digest, Table SI 6.3). We here  
715 present the results we would have obtained without using this correction factor.

716  
717

**Results for the realised distributions**

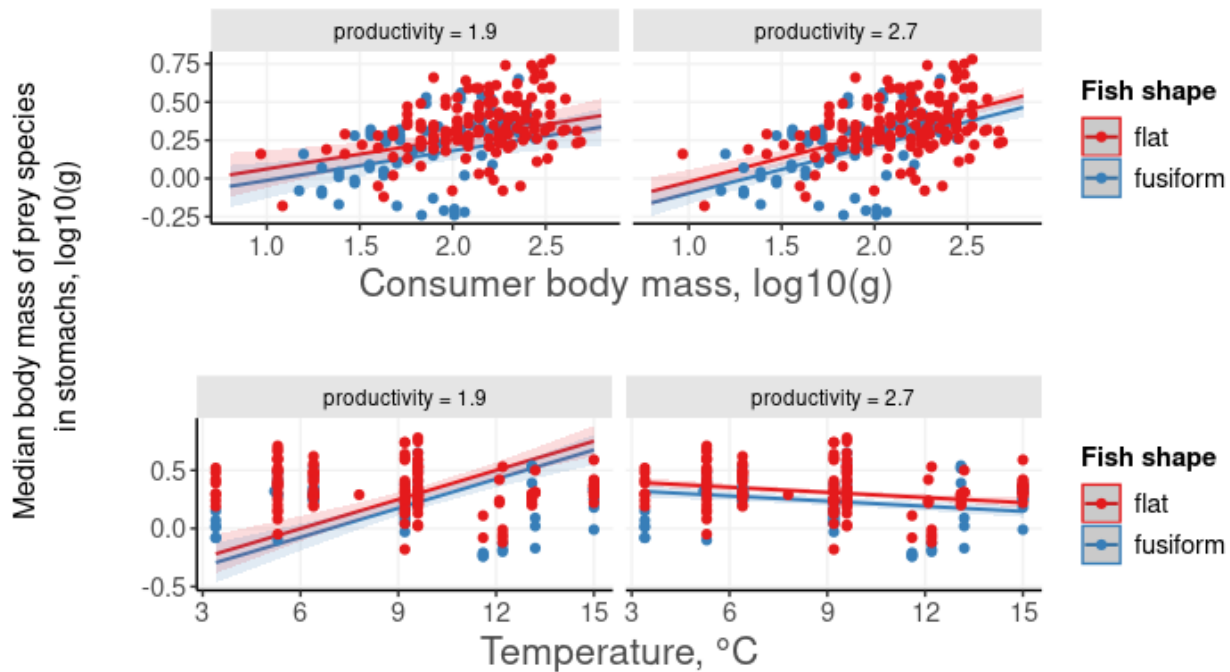

718  
719 *Figure S16.1: Response of the median body mass of the realised prey body mass distribution to predator body mass*  
720 *(a, b), temperature (c, d) at different productivity levels for the two fish shape. Points represent non-transformed data*  
721 *and lines present model predictions. The shaded areas show the 95% confidence interval on the predicted values.*  
722 *Colours represent the fish functional groups (flat versus fusiforms).*

723  
724

Table SI6.1: response of the realised distribution to predator body mass and environmental gradients

| <i>Predictors</i>                        | <b>Median of the realised distribution</b> |               |                  |
|------------------------------------------|--------------------------------------------|---------------|------------------|
|                                          | <i>Estimates</i>                           | <i>CI</i>     | <i>p</i>         |
| (Intercept)                              | -2.57                                      | -3.64 - -1.50 | <b>&lt;0.001</b> |
| Predator body mass                       | -0.09                                      | -0.47 - 0.29  | 0.649            |
| Productivity                             | 0.88                                       | 0.47 - 1.28   | <b>&lt;0.001</b> |
| Shape (fusiform)                         | -0.08                                      | -0.12 - -0.03 | <b>0.001</b>     |
| Temperature                              | 0.32                                       | 0.24 - 0.40   | <b>&lt;0.001</b> |
| pred. BM:Productivity                    | 0.15                                       | 0.00 - 0.30   | <b>0.048</b>     |
| Productivity:Temperature                 | -0.12                                      | -0.15 - -0.09 | <b>&lt;0.001</b> |
| Observations                             | 224                                        |               |                  |
| R <sup>2</sup> / R <sup>2</sup> adjusted | 0.450 / 0.435                              |               |                  |

We can observe that the absence of correction factor does not qualitatively change the trends observed for the realised distributions. The variables selected by the AIC criteria are the same when correction for detectability was used. We can only detect slight changes in the model estimates.

734

735

736

### Response of the preference distribution

737

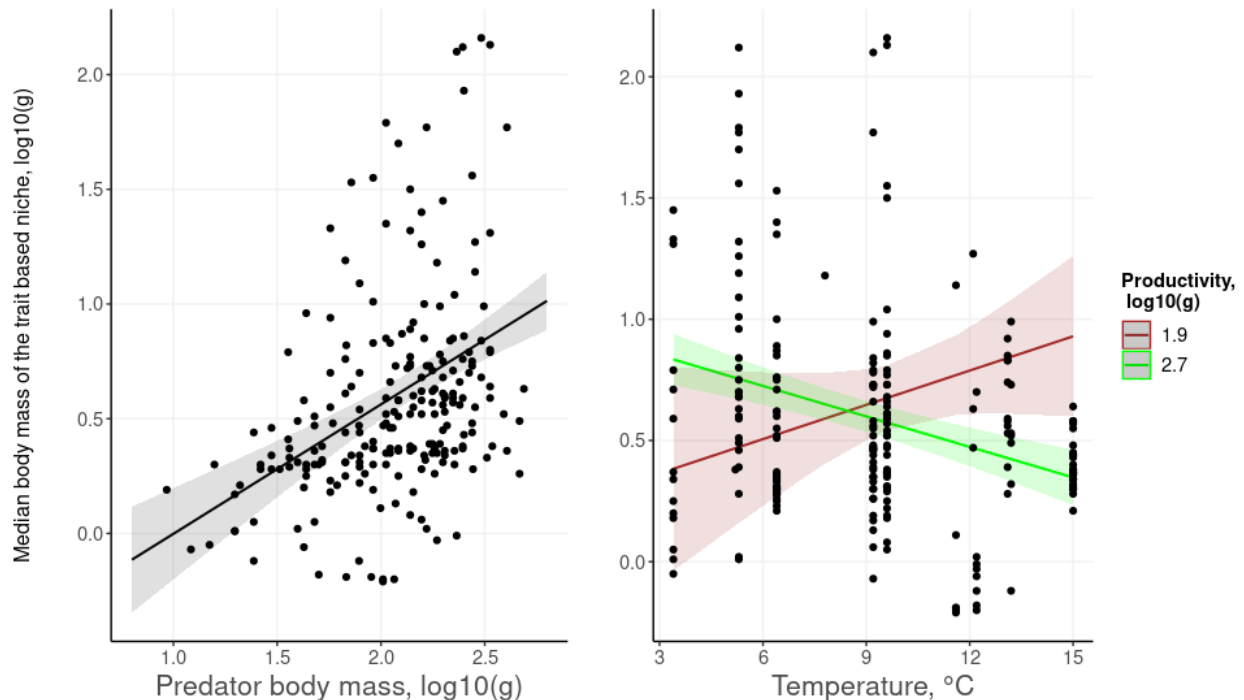

738

739 Figure SI6.2: Response of the median body mass of the preference distribution to temperature,  
 740 productivity, and fish body mass. Points represent non-transformed data and lines represent  
 741 model predictions. The shaded areas show the 95% confidence interval on the predicted values.  
 742 Grey and green colour represent two different productivity levels at which the temperature effect  
 743 is represented

744

745

Table SI 6.2: response of the preference distribution to predator body mass and environmental gradients

746

| <i>Predictors</i>                        | <b>Median of the preference distribution</b> |                 |              |
|------------------------------------------|----------------------------------------------|-----------------|--------------|
|                                          | <i>Estimates</i>                             | <i>CI</i>       | <i>p</i>     |
| (Intercept)                              | -1.252                                       | -3.954 - 1.450  | 0.362        |
| Predator body mass                       | -0.153                                       | -1.115 - 0.809  | 0.754        |
| Productivity                             | 0.392                                        | -0.631 - 1.414  | 0.451        |
| shapefusiform                            | -0.124                                       | -0.238 - -0.011 | <b>0.032</b> |
| Temperature                              | 0.259                                        | 0.051 - 0.466   | <b>0.015</b> |
| pred.BM:productivity                     | 0.268                                        | -0.103 - 0.639  | 0.156        |
| Productivity:Temperature                 | -0.111                                       | -0.189 - -0.033 | <b>0.005</b> |
| Observations                             | 224                                          |                 |              |
| R <sup>2</sup> / R <sup>2</sup> adjusted | 0.282 / 0.262                                |                 |              |

We observed here a change in the model output. The effects of predator body masses and productivity on the median of the preference distributions are not significant anymore. This is likely due presence of the new significant effect of the interaction between these two variables, as we can observe that the plots remain quite similar (Fig.

756 SIVI.2).

757

758

### 759 **Classification of species' digestibility**

760

| <b>Prey species</b>       | <b>Class</b>   | <b>Digestibility</b> |
|---------------------------|----------------|----------------------|
| <i>Abra alba</i>          | Bivalvia       | Hard                 |
| <i>Aloidis gibba</i>      | Bivalvia       | Hard                 |
| <i>Amphicteis gunneri</i> | Polychaeta     | Easy                 |
| <i>Amphipoda</i> spp.     | Malacostraca   | Easy                 |
| <i>Anaitides</i> spp.     | Polychaeta     | Easy                 |
| <i>Anthozoa</i> spp.      | Anthozoa       | Easy                 |
| <i>Aphia minuta</i>       | Actinopterygii | Hard                 |
| <i>Aphroditidae</i> spp.  | Polychaeta     | Easy                 |
| <i>Arenicola marina</i>   | Polychaeta     | Easy                 |
| <i>Ascidacea</i> spp.     | Ascidacea      | Easy                 |
| <i>Astarte</i> spp.       | Bivalvia       | Hard                 |
| <i>Balanus</i> spp.       | Hexanauplia    | Hard                 |
| <i>Brada villosa</i>      | Polychaeta     | Easy                 |
| <i>Capitella capitata</i> | Polychaeta     | Easy                 |
| <i>Carcinus maenas</i>    | Malacostraca   | Hard                 |
| <i>Cardium fasciatum</i>  | Bivalvia       | Hard                 |
| <i>Castalia punctata</i>  | Polychaeta     | Easy                 |
| <i>Clupea harengus</i>    | Actinopterygii | Hard                 |

|                               |                  |      |
|-------------------------------|------------------|------|
| Corophium spp.                | Malacostraca     | Easy |
| Crangon crangon               | Malacostraca     | Hard |
| Cumacea spp.                  | Malacostraca     | Easy |
| Mysidacea spp.                | Malacostraca     | Hard |
| Cyprina islandica             | Bivalvia         | Hard |
| Diastylis rathkei             | Malacostraca     | Easy |
| Disoma multisectosum          | Polychaeta       | Easy |
| Euchone papillosa             | Polychaeta       | Easy |
| Gastosaccus spinifer          | Malacostraca     | Hard |
| Gobiidae spp.                 | Actinopterygii   | Hard |
| Halicryptus spinolosus        | Halicryptomorpha | Hard |
| Harmothoe imbricata           | Polychaeta       | Easy |
| Harmothoe spp.                | Polychaeta       | Easy |
| Hyperia galba                 | Malacostraca     | Easy |
| Idothea spp.                  | Malacostraca     | Hard |
| Isopoda spp.                  | Malacostraca     | Hard |
| Limanda limanda               | Actinopterygii   | Hard |
| Macoma spp.                   | Bivalvia         | Hard |
| Metridium senile              | Anthozoa         | Hard |
| Microdeutopus sp.             | Malacostraca     | Easy |
| Musculus spp.                 | Bivalvia         | Hard |
| Mya truncata, Mya<br>arenaria | Bivalvia         | Hard |
| Mysis mixta                   | Malacostraca     | Hard |
| Mytilus edulis                | Bivalvia         | Hard |
| Nemertea spp.                 | Nemertea         | Easy |
| Nephtys spp.                  | Polychaeta       | Easy |
| Nucula nitida                 | Bivalvia         | Hard |
| Ophiura albida                | Ophiuroidea      | Hard |
| Other Decapoda                | Decapoda         | Hard |
| Other Gastropoda              | Gastropoda       | Hard |
| Other Polychaeta              | Polychaeta       | Easy |
| Pectinaria koreni             | Polychaeta       | Easy |
| Phaxas pellucidus             | Bivalvia         | Hard |
| Pherusa plumosa               | Polychaeta       | Easy |
| Phtisica marina,<br>Caprella  | Malacostraca     | Easy |
| Pisces spp.                   | Actinopterygii   | Hard |
| Pleuronectiformes spp.        | Actinopterygii   | Hard |
| Polydora sp.                  | Polychaeta       | Easy |
| Pomatoschistus<br>minutus     | Actinopterygii   | Hard |

|                       |               |      |
|-----------------------|---------------|------|
| Priapulus caudatus    | Priapulida    | Easy |
| Saxicava arctica      | Bivalvia      | Hard |
| Scoloplos armiger     | Polychaeta    | Easy |
| Spionidae spp.        | Polychaeta    | Easy |
| Terebellides stroemi  | Polychaeta    | Easy |
| Thyonidium pellucidum | Holothuroidea | Hard |
