1 **Title: Adaptive foraging behavior increases vulnerability to climate change**

2 **Authors:** Benoit Gauzens<sup>1,2,\*</sup>, Benjamin Rosenbaum<sup>1,2</sup>, Gregor Kalinkat<sup>3</sup>, Thomas Boy<sup>1,2</sup>,  
3 Malte Jochum<sup>4,5</sup>, Susanne Kortsch<sup>6</sup>, Eoin J. O’Gorman<sup>7</sup>, Ulrich Brose<sup>1,2</sup>.

4 <sup>1</sup> EcoNetLab, German Centre for Integrative Biodiversity Research (iDiv) Halle-Jena-  
5 Leipzig, Leipzig, Germany

6 <sup>2</sup> Institute of Biodiversity, Friedrich Schiller University Jena, Jena, Germany

7 <sup>3</sup> Department of Community and Ecosystem Ecology, Leibniz Institute of Freshwater  
8 Ecology and Inland Fisheries (IGB), Berlin, Germany

9 <sup>4</sup> Experimental Interaction Ecology, German Centre for Integrative Biodiversity Research  
10 (iDiv) Halle-Jena-Leipzig, Leipzig, Germany

11 <sup>5</sup> Leipzig University, Institute of Biology, Leipzig, Germany

12 <sup>6</sup> Spatial Foodweb Ecology Group, Department of Agricultural Sciences, University of  
13 Helsinki, Finland

14 <sup>7</sup> School of Life Sciences, University of Essex, Wivenhoe Park, Colchester CO4 3SQ, UK

15 \* Corresponding author: [benoit.gauzens@idiv.de](mailto:benoit.gauzens@idiv.de)

16

17 **Abstract:**

18 Adaptative foraging behavior should promote species coexistence and biodiversity under climate  
19 change as predators are expected to maximize their energy intake, according to principles of optimal  
20 foraging theory. We test these assumptions using a dataset comprising 2,487 stomach contents of fish  
21 species across functional groups, feeding strategies, and prey availability in the environment over 12  
22 years. Our results show that foraging shifts from trait-dependent prey selectivity to density  
23 dependence in warmer and more productive environments. This behavioral change leads to lower  
24 consumption efficiency as species shift away from their optimal trophic niche, undermining species  
25 persistence and biodiversity. By integrating this adaptive behavior into dynamic models, our study  
26 reveals that adaptive foraging yields higher risk profiles for ecosystems under global warming.

27

28

29 **Main text:**

30

31 Ecosystems are experiencing abrupt changes in climatic conditions, making it ever more important to  
32 predict and understand how they will respond to future changes. Global warming will affect various  
33 levels of biological organization; from physiological processes occurring at the individual level<sup>1</sup> to  
34 patterns at macroecological scales<sup>2</sup>. Warming impacts will cascade through these different  
35 organizational levels, changing species composition<sup>3</sup> as well as community and food web structure<sup>4</sup>.  
36 By scaling up temperature effects from species physiology to food webs<sup>5</sup>, trophic interactions play a  
37 key role in the response of ecosystems to global warming<sup>6</sup>.

38

39 To assess the future of ecological communities, food web models that build on biological processes  
40 observed at the level of individual organisms can be used to translate mechanisms and predictions to  
41 the ecosystem level. For example, Allometric Trophic Networks<sup>7</sup> (ATN) quantify effects of body  
42 mass and temperature on the biological rates of consumers and resources to predict species biomass  
43 changes over time and across environmental conditions<sup>7-9</sup>. Thus, ATNs facilitate understanding of  
44 how physiological responses to warming translate into species coexistence and biodiversity<sup>10</sup>.  
45 However, the ability of ATNs to derive sound predictions for large communities under changing  
46 environmental conditions has been challenged, stressing the need for more biological realism<sup>6,11</sup>.  
47 Indeed, a strong limitation of these models is that species are characterized by a set of biological rates  
48 that respond to temperature, such as metabolic or attack rates. Therefore, species are limited to  
49 physiological responses to warming, whereas the behavioral component is largely ignored. However,  
50 it is well established that species also respond to warming by changing their behavior<sup>12,13</sup>, which helps  
51 to support species coexistence, and thus needs to be incorporated into food web models to improve  
52 their predictive power<sup>14-18</sup>.

53

54 Energetic demands increase with temperature, but species can offset this by adopting various  
55 strategies to increase their energy intake. Species can actively forage on more rewarding

56 resources<sup>13,19</sup>, typically prey that are close to the maximum body mass that consumers can feed on<sup>20</sup>.  
57 Therefore, we expect that predators consume larger prey individuals (trait-based selectivity) at higher  
58 temperatures, reducing predator-prey body mass ratios (H1). Alternatively, individuals under high  
59 energetic stress may be driven by their increased demand for food and accept less rewarding (smaller,  
60 but more abundant) prey upon random encounter (H2) leading to a lower trait-based selectivity, and a  
61 trophic niche driven more by neutral processes (random encounter probability). These two hypotheses  
62 would lead to contrasting effects on communities. Trait-based selectivity (H1) may increase the  
63 strength of interactions between predators and larger prey, depleting the latter's biomass.  
64 Alternatively, if neutral processes are driving selectivity (H2), predators will mostly forage on more  
65 abundant species, leading to a stronger control of their biomass, which could prevent competitive  
66 exclusion and therefore enhance species coexistence<sup>17,21</sup>. To test these hypotheses, we compiled a  
67 database of 22,185 stomach contents from six demersal fish species and analyzed their behavioral  
68 response to changes in temperature and productivity. Subsequently, we addressed the consequences of  
69 these empirical relationships by integrating them into a population-dynamical model to predict how  
70 species coexistence changes with warming.

71

## 72 **Response of fish to temperature and productivity gradients**

73 We used our database to document how consumer foraging behavior responds to temperature and  
74 productivity. The six fish species considered belong to two functional groups differing in body shape  
75 and foraging behavior (flat, sit-and-wait predators versus fusiform, active hunters). We used empirical  
76 means and standard deviations to describe the prey body mass distributions observed in fish stomachs  
77 (hereafter called the *realized distribution*) and in the environment (hereafter called the *environmental*  
78 *distribution*) (Fig. 1). The environmental distribution defines what is expected if neutral processes  
79 drive fish diets: it represents the expected body mass distribution of prey in fish stomachs if  
80 consumption was driven by density-based encounter rates only. However, the size distributions of  
81 prey in the environment and in consumer diets are usually not identical because consumers actively  
82 select prey individuals with specific body masses. We used the ratio of realized and environmental  
83 distributions to calculate fish selectivity with respect to these different prey body masses to obtain a

84 *preference distribution* (Fig. 1), which describes consumer selectivity based on traits and consumer  
85 behavioral decisions. Traits define the fundamental trophic niche of a species (what a consumer can  
86 eat), while behavioral decisions define which parts of this fundamental niche the consumer will focus  
87 on. Therefore, a shift in behavior does not necessarily imply a shift in the identity of prey species, but  
88 can simply lead to a shift in the individual traits that are selected, within or across different species.  
89  
90 We first described how the body mass distributions in consumer stomachs were changing with  
91 predator body mass and foraging strategy, as well as environmental conditions (temperature and  
92 productivity) using a linear model to predict the median of the realized distribution. We selected the  
93 most parsimonious model based on AIC. As expected<sup>22</sup>, we observed that the median of prey body  
94 mass in consumer guts increased with predator body mass in a similar way for the two different  
95 predator body shapes and foraging strategies (Fig. 2(A), Table 1). The body mass of consumed prey  
96 decreased with temperature, with a stronger effect in fusiform fish (Fig. 2(B), Table 1).  
97 These effects alone are insufficient to describe a change in fish behavior as the distribution of prey  
98 body masses in the environment also changes with environmental temperature and productivity (SI I).  
99 To disentangle the effect of prey availability (neutral processes) from the fish behavioral response, we  
100 estimated the preference distribution that depicts consumer selectivity independent of the  
101 environmental prey distribution and analyzed its response to test our two hypotheses. To do so, we  
102 built a Bayesian linear model with temperature, productivity, fish functional group, and consumer  
103 body mass as main effects, and interactive effects corresponding to our hypotheses: between  
104 temperature and productivity and between temperature and fish functional group (see Methods).  
105 Comparison of models with and without consumer fish functional group as a covariate with a “Leave  
106 One Out cross” validation approach<sup>23</sup> indicated that the behavioral responses to temperature and  
107 productivity were similar for fish species with different body shapes and foraging strategies. We  
108 therefore excluded this variable from the final model. Our results confirm the importance of species  
109 traits for structuring trophic interactions, as larger fish are foraging on larger prey (Fig. 3(A)). They  
110 also emphasize that ecosystem productivity alters the temperature-dependence of fish foraging  
111 behavior with a significant interaction between temperature and productivity (Fig 3(B), Table 2). The

112 temperature effect was negative only in high productive environments (SI II), indicating that fish only  
113 adapted their feeding behavior to temperature by foraging on smaller prey in warmer conditions when  
114 resources were plentiful.

115

116 The energetic stress that warming imposes on individuals through increased metabolic rates should be  
117 mitigated by higher feeding rates at higher prey availability in more productive environments. Thus,  
118 because the effects of temperature and productivity should cancel each other out, we expected a  
119 stronger adaptive response at low productivity, where consumers must cope with maximum energetic  
120 stress. Surprisingly, we did not find a significant effect of temperature on preference for prey sizes in  
121 the least productive environments (Fig. 3(B), SI III). At very low productivity, fish are experiencing  
122 high energetic stress (regardless of temperature) because resource density is low and they cannot  
123 afford to miss a prey upon encountering it, even if it is much smaller than preferred. Under such  
124 stressful conditions, there may be no scope for predators to adapt their feeding behavior as  
125 temperature increases. In more productive environments, feeding behavior may be less constrained,  
126 increasing the adaptive capacity of the fish. Thus, high resource availability and the low energetic  
127 demands of a cool environment result in low energetic stress, allowing fish to select prey based on  
128 traits, whereas warming increases energetic stress because demands rise even though resource  
129 availability is the same, forcing fish to become less selective in their feeding behavior.

130

131 Therefore, our results support hypothesis 2 that fish become less selective for prey size as temperature  
132 increases in productive environments so they do not miss a foraging opportunity, which is consistent  
133 with what happens at any temperature when productivity is low. This density driven feeding behavior,  
134 which lowers trait-based selectivity, imposes several disadvantages on consumers. We observed a  
135 weak negative effect of temperature on the width of consumer trophic niches at high productivity  
136 levels (SI III), indicating that consumers miss out on larger and thus energetically more rewarding  
137 prey individuals, which can be critical to satisfy their energetic needs<sup>24</sup>, while handling the more  
138 abundant smaller prey. This observation tends to mitigate our assumption that adaptive behavior  
139 leading to more neutral-driven consumption should increase species coexistence in the face of

140 warming. Indeed, fish metabolic rates increase with warming over large temperature gradients<sup>25</sup> and  
141 do so faster than feeding rates, leading to the extinction of top predators due to starvation<sup>26,27</sup>.  
142 Combining this physiological starvation effect with our observed behavioral response indicates that  
143 consuming outside of the most efficient predator-prey body mass ratio should reduce energy flux  
144 through food webs, limiting the coexistence of consumer species<sup>24,28</sup>. The combination of direct and  
145 indirect effects of warming could thus increase the likelihood of extinction of top predators in food  
146 webs, which are usually considered key species for maintaining biodiversity and ecosystem  
147 functioning<sup>29</sup>.

148

### 149 **Consequences for species coexistence under global warming**

150 Adaptive foraging in response to varying local conditions is often considered to foster species  
151 coexistence<sup>17,18,30</sup>. The general assumption behind this conclusion is that consumer species will adapt  
152 their foraging strategies in order to maximize their energetic gains<sup>31</sup>. However, our results, based on  
153 an allometric framework, suggest that consumers tend to depart from this optimal behavior under  
154 stressful conditions. We explored the consequences of this behavior using a population dynamic  
155 model, parameterized with species body masses and temperature, which predicts the temporal  
156 dynamics and coexistence of species in food webs (see Methods). We ran two versions of this model:  
157 one including adaptation of species diets to local temperature and productivity conditions as informed  
158 by our empirical results, and one without this adaptation, corresponding to the classical modelling  
159 approach. We simulated the dynamics for synthetic food webs of 50 species (30 consumers and 20  
160 basal species) over a temperature gradient spanning from 0°C to 26°C to predict the number of  
161 extinctions at different temperatures. Overall, we observed that models incorporating adaptive  
162 foraging were more sensitive to warming, with more species extinctions over the temperature gradient  
163 (Fig. 4). These results were not affected by the functional response type, which are free parameters in  
164 our model (SI IV) but tended to weaken at very low levels of nutrient availability (i.e. productivity),  
165 consistently with our empirical results.

166

167 The effects of warming on the trait structure of communities and the distribution of trophic  
168 interactions<sup>32</sup> are well documented, but a framework for integrating changes in feeding behavior with  
169 a general modelling approach has been lacking. Our results stress the importance of accounting for  
170 foraging behavior to better understand and predict community responses to climate change, and  
171 challenge previous conclusions on this topic. Indeed, the discrepancies between the models with and  
172 without adaptive foraging suggest that the classical approach, which only accounts for changes in  
173 species physiology<sup>6,10</sup>, may have overlooked a significant portion of species responses to warming.  
174 Importantly, our results show that, contrary to common expectation, behavioral adaptations in  
175 response to climatic stress reduce the likelihood of species coexistence and community biodiversity.  
176 The similarity in responses between the two feeding strategies of our consumer species (sit-and-wait  
177 and active foraging) indicates some generality of our results, but it is now important to investigate a  
178 wider range of species and ecosystem types. For instance, metabolic type has an important effect on  
179 the response of species to temperature<sup>33</sup> and endotherms could respond differently to ectotherms such  
180 as fish.

181

182 Generally, food web models incorporating foraging behavior are based on optimal foraging theory  
183 and thus miss a data-driven description of how the selectivity of consumer diets changes in a natural  
184 context. To address this, we developed a trait-based framework to document the response of foraging  
185 behavior to temperature, which can be incorporated into predictive models of food web structure and  
186 species coexistence. Our approach can be generalized to other ecological variables that affect food  
187 webs and foraging behavior, such as fear of predators<sup>34</sup> or habitat complexity<sup>35</sup>. Finally, the effects  
188 documented here come from data sampled at rather low levels of temperature and productivity.  
189 Therefore, it is crucial to extend our regression models to warmer and more productive ecosystems to  
190 assess whether very high levels of productivity could balance the energetic stress related to rising  
191 temperatures, limiting adaptive responses in eutrophic environments.

192

193 **Conclusion**

194 It is generally assumed that consumers respond to environmental conditions by making choices that  
195 maximize their energy intake<sup>18,36</sup>. This assumption has been used to derive several predictions in  
196 ecology about community structure and species coexistence, and is often considered as a solution to  
197 May's paradox<sup>37</sup> of the mathematical infeasibility of complex communities despite empirical  
198 observations of ecosystem complexity. It is therefore usually assumed that behavior is a strong driver  
199 of community organization and supports species coexistence. We challenge this optimistic view of  
200 nature by demonstrating how consumer species can depart from their optimal behavior under stressful  
201 conditions, for instance when resources are scarce and they face energetic stress due to warming.  
202 Therefore, the ecological conclusions built into the assumptions that adaptive behavior favors  
203 coexistence do not necessarily hold in the context of global warming. Our mechanistic modelling  
204 demonstrates the consequences of this observation, with more species extinctions in response to  
205 warming when adaptive foraging is considered. This indicates that global warming may lead to a  
206 greater reduction in species coexistence than predicted by classical ecological models. Our findings  
207 also challenge the general paradigm that adaptive foraging should mitigate the consequences of global  
208 warming for natural ecosystems and call for a general data-driven theory-approach to forecasting  
209 biodiversity and functioning in future ecosystems.

210

## 211 **Methods**

212

### 213 *The Kiel Bay database*

214 Kiel Bay is located in the Baltic Sea, which is a marginal sea connected to the North Atlantic and  
215 considered the largest brackish sea in the world. It is a rather low productivity ecosystem with low  
216 biodiversity due to its glacial history and the strong salinity gradients that only a few species can  
217 tolerate<sup>38,39</sup>. The core of the Kiel Bay database comprises detailed dietary information based on  
218 stomach contents from 22,185 fish individuals of six species. These species were classified into two  
219 functional groups based on their body shape and habitat use: fusiform and benthopelagic species  
220 (*Gadus morhua*, *Merlangius merlangius*) versus flat and demersal species (*Limanda limanda*,



221 *Pleuronectes platessa*, *Platichthys flesus*, and *Hippoglossoides platessoides*). This shape characteristic  
222 also corresponds to specific foraging behaviour<sup>40</sup>.

223

224 The fish individuals were sampled using systematic and standardised bottom trawls. The trawls were  
225 carried out year-round between 1968 and 1978. The body lengths of fish were measured and rounded  
226 to the nearest integer (in cm). Species-specific regressions were used to estimate fish body masses.

227 Stomach contents were identified to the highest taxonomic resolution possible and wet mass  
228 determined when possible. Hence, the database includes body size data for all fish (i.e. predators) but  
229 also for prey items from the stomach contents<sup>41</sup>. In addition, we were able to add independently-

230 sampled abundance and body mass information on the benthic invertebrate (i.e. prey) fauna to the

231 database. These data on prey abundances and body masses were sampled independently at the

232 trawling locations using classical 0.1 m<sup>2</sup> van Veen grabs<sup>42</sup> (see <sup>43</sup> for detailed procedure). We have

233 enriched the database with climatic (i.e. temperature) and oceanographic (i.e. salinity) data and

234 geographical information on the distances between the sampling (trawling) sites. So far, the stomach

235 content data have been published only partially and in German language<sup>41</sup> while parts of the

236 invertebrate abundance data were treated and published separately<sup>43</sup>. The food web mainly consists of

237 six demersal fish species and more than a dozen benthic invertebrate species from different groups

238 (see Table SI V 2).

239

#### 240 *Filtering data*

241 To make comparisons between the distributions of prey observed in fish stomachs and the ones

242 observed in the environment, we only used a subset of the database for which we were able to (i)

243 associate information about a fish to information about its environment and (ii) have a body mass

244 estimate of prey found in the stomach. We considered this association between fish and environment

245 possible, when they were sampled in the same area and within less than 31 days. This first filter

246 reduced the number of fish used in our analysis to 2,487.

247

248 From this subset, we pooled all individuals from the same functional group occurring at the same  
249 place on the same date with the same body mass into a unique entity for statistical analysis, which we  
250 hereafter call “statistical fish”. This choice is led by the allometric approach used in our analysis,  
251 where all individuals from the same species and with the same body mass are considered identical.  
252 This aggregation increases the quality of the estimation of the prey body mass distribution in  
253 stomachs at the cost of a lower statistical power for the analyses done on the shape of these  
254 distributions. For instance, with a high aggregation level, fewer data points are available to consider  
255 the effect of temperature on the average body mass of prey. This approach is therefore conservative as  
256 it reduces the probability of type 1 error. Lastly, we removed 26 statistical fish where less than 90% of  
257 the prey biomass found in the diet was also found in the environment. This resulted in a final dataset  
258 of 290 statistical fish, underpinned by 2,487 individuals. For our statistical analysis, we used fish body  
259 shape as a covariate instead of fish species, as models based on fish body shape were always found to  
260 be more parsimonious (based on AIC).

261

#### 262 *Fitting of gut content and environmental distributions*

263 We used empirical means and standard deviations to describe all environmental distributions of  $\log_{10}$   
264 body masses and realised distributions of each predator identity. Taxon-specific characteristics of the  
265 prey, such as body toughness, could bias the dietary distributions towards prey containing shells or  
266 skeletons. We assumed that prey with hard body parts are more likely to be detected in stomach  
267 contents than species composed of soft tissues (due to their higher digestion time) and weighted their  
268 occurrence by a correction factor of 0.8<sup>44</sup>. Overall, the trends and effects observed when including this  
269 correction were similar to those observed without correction, thus suggesting an absence of systematic  
270 biases (SI V).

271

#### 272 *Determining allometric species' preferences*

273 We assumed that a feeding event is defined by two independent probabilities: the probability for a  
274 consumer to encounter a prey of a certain body size  $x$  (defined by the environmental distribution  $E(x)$ )

275 and the probability for a consumer to consume the prey when encountered (given by the preference  
276 distribution  $P(x)$ ). Then, the realised distribution is proportional to their product

$$277 \quad R(x) \sim E(x) \cdot P(x)$$

278 The preference distribution can therefore be expressed by the departure of the realised niche from the  
279 environmental distribution, or by filtering out the effect of species environmental availability from the  
280 realised distribution:

$$281 \quad P(x) \sim \frac{R(x)}{E(x)}$$

282 Theoretically, it is possible to compute continuous distributions  $R$  and  $E$  from observed body masses  
283  $r_i$  ( $i=1\dots n$ ) and  $e_i$  ( $i=1\dots m$ ), respectively, with e.g. kernel density estimation, and compute

$$284 \quad P(x) = \frac{R(x)}{E(x)} / \int \frac{R(x)}{E(x)} dx$$

285 We chose, however, a more conservative approach that requires just a kernel density estimate for the  
286 environmental distribution  $E(x)$ : Moments of  $P(x)$  can be computed as weighted moments of the  
287 observed realised body masses  $r_i$  with weights  $w_i=1/E(r_i)$  as the inverse of environmental abundances.  
288 Thus, realised body masses that are highly abundant in the environment contribute less to the  
289 preference distribution, while those that are rare contribute more. Following<sup>45</sup> and assuming  $W =$   
290  $\sum_i w_i$ , the mean  $\mu$ , variance  $\sigma^2$  and skewness  $\gamma$  of the preference distribution  $P(x)$  are:

$$291 \quad \mu = \frac{1}{W} \sum_i w_i r_i,$$

$$292 \quad \sigma^2 = \frac{1}{W} \sum_i w_i (r_i - \mu)^2$$

$$293 \quad \gamma = \frac{1}{W\sigma^3} \sum_i w_i (r_i - \mu)^3$$

294 To assess changes in the distributions and how they depart from each other, we used variations in the  
295 point estimates (median and standard deviation).

296

### 297 *Statistical analyses*

298 To fit the parameters associated to the environmental and dietary (i.e. realised) distributions, we used  
299 an exploratory approach without a priori hypotheses, as the goal was to obtain a description of the

300 different environmental conditions for fishes. To do so, we selected the most parsimonious models  
301 (based on AIC) within all the possible sub models deriving from the complete model with all  
302 covariates and their interactions. For the environmental distribution, the complete model was defined  
303 as a linear model including temperature and productivity (estimated from prey availability, grams log  
304 transformed) and their interactions as covariates. For the gut distribution, the complete model was  
305 defined as a linear model including temperature, productivity (log transformed), fish body shape and  
306 fish body mass (log transformed), as well as all possible interactions.  
307 For the preference distributions, we used a Bayesian framework to explicitly test our hypotheses and  
308 started our analysis considering temperature, productivity, fish body shape, and fish body mass as  
309 covariates, as well as interactions between temperature and shape and temperature and productivity to  
310 answer to hypotheses H1 and H2. We first checked if fish body shape was an important predictor in  
311 our model using a “Leave-one-out” cross validation<sup>23</sup>, and finally simplified our model by removing  
312 fish body shape from the covariates (see SI VI for a more comprehensive comparison of the different  
313 models).

314

### 315 *Dynamic model*

316 To simulate the population dynamics, we used a previously published model<sup>46</sup>, based on the Yodzis  
317 and Innes framework<sup>47</sup>. The growth of consumer species  $B_i$  is determined by the balance between its  
318 energetic income (predation) and its energetic losses (predation metabolism)

319

$$320 \frac{dB_i}{dt} = e_p B_i \sum_j F_{ij} + e_A B_i \sum_j F_{ij} - \sum_j B_i F_{ji} - x_i B_i,$$

321 where  $e_p = 0.545$  and  $e_a = 0.906$  represent the assimilation efficiency of a consumer foraging on plants  
322 and animals, respectively<sup>48</sup>.  $x_i$  defines the metabolic rate of species  $i$ , which scales allometrically with  
323 body mass:

$$324 x_i = x_0 m_i^{-0.25} e^{\frac{E_x(T_0 - T)}{kT_0T}},$$

325 where  $x_0 = 0.314$  is the scaling constant<sup>46</sup>,  $E_x = -0.69$  is the activation energy of metabolic rate

326 (Binzer et al. 2015),  $k$  the Boltzmann constant,  $T_0 = 293.15$  the reference temperature in Kelvin and  $T$

327 the temperature at which the simulation is performed. The trophic interactions are determined using a  
328 functional response  $F_{ij}$  that describes the feeding rate of consumer  $i$  over resource  $j$ :

$$329 \quad F_{ij} = \frac{\omega_{ij} b_{ij} B_j^{1+q}}{1 + c B_i + \omega_{ij} \sum_k h_i b_{ik} B_k^{1+q}} \cdot \frac{1}{m_x}.$$

330

331  $b_{ij}$  represent the species-specific capture and is determined by predator and prey body masses:

$$332 \quad b_{ij} = P_{ij} L_{ij}.$$

333 It corresponds to the product of encounter probabilities  $P_{ij}$  by the probability that an encounter leads  
334 to a realised predation event  $L_{ij}$ . As such, the parameters encode neutral processes (encounter

335 probabilities) and trait-based selectivity, as the distribution  $L_{ij}$  represents the fundamental trophic

336 niche of consumer  $i$ , i.e. the set of prey it can consume based on its traits. Both quantities are

337 determined by species body masses. We assume that encounter probability is more likely for species

338 with higher movement speeds of both consumer and resource species:

$$339 \quad P_{ij} = p_0 m_i^{\beta_i} m_j^{\beta_j} e^{E_p \frac{T_0 - T}{k T_0 T}}.$$

340 Since movement speed scales allometrically and based on feeding type<sup>49</sup>, we drew  $\beta_i$  and  $\beta_j$  from

341 normal distributions (carnivore:  $\mu_\beta = 0.42$ ,  $\sigma_\beta = 0.05$ , omnivore:  $\mu_\beta = 0.19$ ,  $\sigma_\beta = 0.04$ , herbivore:  $\mu_\beta =$

342  $0.19$ ,  $\sigma_\beta = 0.04$ , primary producer:  $\mu_\beta = 0$ ,  $\sigma_\beta = 0$ ). Activation energy  $E_p$  is equal to  $-0.38$ , from<sup>10</sup>.  $L_{ij}$  is

343 assumed to follow a Ricker curve<sup>46</sup>, defined as:

$$344 \quad L_{ij} = \left( \frac{m_i}{m_j R_{opt}} e^{1 - \frac{m_i}{m_j R_{opt}}} \right)^\gamma,$$

345 where the optimal consumer-resource body mass ratio  $R_{opt} = 71.68$  was calculated from the observed

346 realised interactions in our dataset. We used a threshold  $L_{ij} < 0.01$  under which values were set to 0,

347 assuming that consumers do not consider prey which are too small or too large. The handling time  $h_{ij}$

348 of  $i$  on  $j$  is defined as:

$$349 \quad h_{ij} = h_0 m_i^{\eta_i} m_j^{\eta_j} e^{E_h \frac{T_0 - T}{k T_0 T}},$$

350 where the scaling constant  $h_0$  was set to 0.4 and the allometric coefficients for  $\eta_i$  and  $\eta_j$  where drawn

351 from a normal distribution with mean and standard deviation of  $-0.48$  and  $0.03$  for  $\eta_i$  and of  $-0.66$  and

352  $0.02$  for  $\eta_j$ .  $E_h$  is equal to  $0.26$ . The term  $w_{ij}$  informs on species selectivity<sup>50</sup>, describing the foraging

353 effort of a given consumer on part of its fundamental niche (described by the  $L_{ij}$ ). For the models  
354 without behavioural expectations we used the classical parametrisation and defined it for every  $j$  as 1  
355 over the number of prey of consumer  $i$ . When adaptive behaviour was included in the model, the  
356 value was determined by the predictions of our dataset: we used the moments (mean, standard  
357 deviation and skewness) of the different preference distributions to estimate parameters of a skewed  
358 normal distribution that we related to temperature, predator body mass, ecosystem productivity and  
359 the interaction between temperature and productivity using a linear model for parameters associated to  
360 location and shape and generalised linear model with a log link function for the scale parameter that  
361 is positive real.. To maintain the comparability with the model without adaptive behaviour, the  $w_{ij}$   
362 values were transformed so that their sum was equal to 1 for each consumer. As for our experimental  
363 data, productivity was defined as the total biomass of prey available for each consumer. As this value  
364 can be highly variable during the simulations, especially in the transient dynamics, we rescaled this  
365 value between 0 and 6 to maintain it to a scale that is similar to the one from our dataset that we used  
366 to inform the skew normal distributions

367 The biomass dynamic of the basal species  $i$  is defined as:

$$368 \frac{dB_i}{dt} = r_i G_i B_i - \sum_j B_j F_{ji} - x_i B_i,$$

369 where  $r_i = m_i^{-0.25}$  defines the species growth rate.  $G_i$  is the species-specific growth factor, determined  
370 by the concentration of two nutrients  $N_1$  and  $N_2$ :

$$371 G_i = \min\left(\frac{N_1}{K_{i1} + N_1}, \frac{N_2}{K_{i2} + N_1}\right),$$

372 Where  $K_{il}$  determines the half saturation density of plant  $i$  nutrient uptake rate, determined randomly  
373 from a uniform distribution in [0.1, 0.2]. The dynamic of the nutrient concentrations is defined by:

$$374 \frac{dN_l}{dt} = D(S_l - N_l) - v_l \sum_i r_i G_i P_i,$$

375 Where  $D = 0.25$  determines the nutrient turnover rate and  $S_l = 5$  determines the maximal nutrient  
376 level. The loss of a specific nutrient  $N_l$  is limited by its relative content in plant species biomass ( $v_1=1$ ,  
377  $v_2=0.5$ ). We ran our model on food webs of 50 species, composed of 30 consumers and 20 basal  
378 species. A link was drawn between two species  $i$  and  $j$  when  $L_{ij} > 0$ . For each temperature we ran 50  
379 replicates of the two versions of the model (with and without adaptive behaviour) using an updated

380 version of the ATNr package<sup>51</sup> and recorded the number of extinctions. We fitted a GAM model on  
381 this number of extinctions.

382

383 **Code and data availability:** Code and data can be made available to editors and reviewers on  
384 request. Should the manuscript be accepted, code and data will be made publicly available and  
385 associated to a DOI.

386

387 **References:**  
388

- 389 1. Dell, A. I., Pawar, S. & Savage, V. M. Systematic variation in the temperature dependence of  
390 physiological and ecological traits. *Proc. Natl. Acad. Sci. U. S. A.* **108**, 10591–10596 (2011).
- 391 2. Free, C. M. *et al.* Impacts of historical warming on marine fisheries production. *Science (80-. )*. **363**,  
392 979–983 (2019).
- 393 3. Lenoir, J. *et al.* Species better track climate warming in the oceans than on land. *Nat. Ecol. Evol.* **4**,  
394 1044–1059 (2020).
- 395 4. Brose, U. *et al.* Predator traits determine food-web architecture across ecosystems. *Nat. Ecol. Evol.* **3**,  
396 (2019).
- 397 5. Petchey, O. L., Brose, U. & Rall, B. C. Predicting the effects of temperature on food web connectance.  
398 *Philos. Trans. R. Soc. B Biol. Sci.* **365**, 2081–2091 (2010).
- 399 6. Gauzens, B., Rall, B. C., Mendonça, V., Vinagre, C. & Brose, U. Biodiversity of intertidal food webs in  
400 response to warming across latitudes. *Nat. Clim. Chang.* **10**, 264–269 (2020).
- 401 7. Martinez, N. D. Allometric Trophic Networks From Individuals to Socio-Ecosystems: Consumer–  
402 Resource Theory of the Ecological Elephant in the Room. *Frontiers in Ecology and Evolution* vol. 8 92  
403 (2020).
- 404 8. Boit, A., Martinez, N. D., Williams, R. J. & Gaedke, U. Mechanistic theory and modelling of complex  
405 food-web dynamics in Lake Constance. *Ecol. Lett.* **15**, 594–602 (2012).
- 406 9. Curtsdotter, A. *et al.* Ecosystem function in predator–prey food webs—confronting dynamic models  
407 with empirical data. *J. Anim. Ecol.* **88**, 196–210 (2019).
- 408 10. Binzer, A., Guill, C., Rall, B. C. & Brose, U. Interactive effects of warming, eutrophication and size  
409 structure: Impacts on biodiversity and food-web structure. *Glob. Chang. Biol.* **22**, 220–227 (2016).
- 410 11. Sauve, A. M. C. & Barraquand, F. From winter to summer and back: Lessons from the parameterization  
411 of a seasonal food web model for the Białowieża forest. *J. Anim. Ecol.* **89**, 1628–1644 (2020).
- 412 12. Abram, P. K., Boivin, G., Moiroux, J. & Brodeur, J. Behavioural effects of temperature on ectothermic  
413 animals: unifying thermal physiology and behavioural plasticity. *Biol. Rev.* **92**, 1859–1876 (2017).
- 414 13. Sentis, A., Hemptinne, J. L. & Brodeur, J. Towards a mechanistic understanding of temperature and  
415 enrichment effects on species interaction strength, omnivory and food-web structure. *Ecol. Lett.* **17**,  
416 785–793 (2014).
- 417 14. Abrams, P. A. Dynamics and Interactions in Food Webs with Adaptive Foragers. in *Food Webs* 113–  
418 121 (Springer US, 1996). doi:10.1007/978-1-4615-7007-3\_11.
- 419 15. Abrams, P. & Matsuda, H. Effects of adaptive predatory and anti-predator behaviour in a two-prey-one-  
420 predator system. *Evol. Ecol.* **7**, 312–326 (1993).
- 421 16. Valdovinos, F., Ramos-Jiliberto, R., Garay-Narva´ez, L., Pasquinell, U. & Dunne, J. A. Consequences  
422 of adaptive behaviour for the structure and dynamics of food webs. *Ecol. Lett.* **13**, 1546–1559 (2010).
- 423 17. Kondoh, M. Does foraging adaptation create the positive complexity-stability relationship in realistic  
424 food-web structure? *J. Theor. Biol.* **238**, 646–51 (2006).
- 425 18. Kondoh, M. Foraging adaptation and the relationship between food-web complexity and stability.  
426 *Science (80-. )*. **299**, 1388–1391 (2003).
- 427 19. Lemoine, N. P., Drews, W. A., Burkepile, D. E. & Parker, J. D. Increased temperature alters feeding



- 428 behavior of a generalist herbivore. *Oikos* **122**, 1669–1678 (2013).
- 429 20. Portalier, S. M. J., Fussmann, G. F., Loreau, M. & Cherif, M. The mechanics of predator–prey  
430 interactions: First principles of physics predict predator–prey size ratios. *Funct. Ecol.* **33**, 323–334  
431 (2019).
- 432 21. Gauzens, B., Legendre, S., Lazzaro, X. & Lacroix, G. Intermediate predation pressure leads to maximal  
433 complexity in food webs. *Oikos* **125**, 595–603 (2016).
- 434 22. Tsai, C.-H., Hsieh, C. & Nakazawa, T. Predator-prey mass ratio revisited: Does preference of relative  
435 prey body size depend on individual predator size? *Funct. Ecol.* (2016) doi:10.1111/1365-2435.12680.
- 436 23. Vehtari, A., Gelman, A. & Gabry, J. Practical Bayesian model evaluation using leave-one-out cross-  
437 validation and WAIC. *Stat. Comput.* **27**, 1413–1432 (2017).
- 438 24. Brose, U. Body-mass constraints on foraging behaviour determine population and food-web dynamics.  
439 *Funct. Ecol.* **24**, 28–34 (2010).
- 440 25. Clarke, A. & Johnston, N. M. Scaling of metabolic rate with body mass and temperature in teleost fish.  
441 *J. Anim. Ecol.* **68**, 893–905 (1999).
- 442 26. Vucic-Pestic, O., Ehnes, R. B., Rall, B. C. & Brose, U. Warming up the system: Higher predator feeding  
443 rates but lower energetic efficiencies. *Glob. Chang. Biol.* **17**, 1301–1310 (2011).
- 444 27. Archer, L. C. *et al.* Consistent temperature dependence of functional response parameters and their use  
445 in predicting population abundance. *J. Anim. Ecol.* **88**, 1670–1683 (2019).
- 446 28. Guzman, L. M. & Srivastava, D. S. Prey body mass and richness underlie the persistence of a top  
447 predator. *Proc. R. Soc. B Biol. Sci.* **286**, (2019).
- 448 29. Birkeland, C. & Dayton, P. K. The importance in fishery management of leaving the big ones. *Trends in*  
449 *Ecology and Evolution* vol. 20 356–358 (2005).
- 450 30. Stump, S. M. & Chesson, P. How optimally foraging predators promote prey coexistence in a variable  
451 environment. *Theor. Popul. Biol.* **114**, 40–58 (2017).
- 452 31. Pyke, G. H., Pulliam, H. R. & Charnov, E. L. Optimal Foraging: A Selective Review of Theory and  
453 Tests. *Q. Rev. Biol.* **52**, 137–154 (1977).
- 454 32. O’Gorman, E. J. *et al.* A simple model predicts how warming simplifies wild food webs. *Nature*  
455 *Climate Change* vol. 9 611–616 (2019).
- 456 33. Pinsky, M. L., Eikeset, A. M., McCauley, D. J., Payne, J. L. & Sunday, J. M. Greater vulnerability to  
457 warming of marine versus terrestrial ectotherms. *Nature* **569**, 108–111 (2019).
- 458 34. Ho, H., Tylianakis, J. M., Zheng, J. X. & Pawar, S. Predation risk influences food-web structure by  
459 constraining species diet choice. *Ecol. Lett.* **22**, 1734–1745 (2019).
- 460 35. Jinks, K. I. *et al.* Habitat complexity influences the structure of food webs in Great Barrier Reef seagrass  
461 meadows. *Ecosphere* **10**, e02928 (2019).
- 462 36. Petchey, O. L., Beckerman, A. P., Riede, J. O. & Warren, P. H. Size, foraging, and food web structure.  
463 *Proc. Natl. Acad. Sci. U. S. A.* **105**, 4191–6 (2008).
- 464 37. May, R. M. Qualitative Stability in Model Ecosystems. *Ecology* **54**, 638–641 (1973).
- 465 38. Elmgren, R. & Hill, C. Ecosystem function at low biodiversity – the Baltic example. in *Marine*  
466 *Biodiversity* 319–336 (Cambridge University Press, 2010). doi:10.1017/cbo9780511752360.015.
- 467 39. Elmgren, R. Man’s impact on the ecosystem of the Baltic Sea: Energy flows today and at the turn of the

- 468 century. *Ambio* **18**, 326–332 (1989).
- 469 40. Russo, T., Costa, C. & Cataudella, S. Correspondence between shape and feeding habit changes  
470 throughout ontogeny of gilthead sea bream *Sparus aurata* L., 1758. *J. Fish Biol.* **71**, 629–656 (2007).
- 471 41. Arntz, W. E. Die Nahrung juveniler Dorsche (*Gadus morhua* L.) in der Kieler Bucht. in *Berichte der*  
472 *Deutschen wissenschaftlichen Kommission für Meeresforschung* 129–183 (1974).
- 473 42. Lie, U. & Pamatmat, M. M. digging characteristics and sampling efficiency of the 0.1 m<sup>2</sup> van veen  
474 grab. *Limnol. Oceanogr.* **10**, 379–384 (1965).
- 475 43. Gröger, J. & Rumohr, H. Modelling and forecasting long-term dynamics of Western Baltic  
476 macrobenthic fauna in relation to climate signals and environmental change. *J. Sea Res.* **55**, 266–277  
477 (2006).
- 478 44. Jobling, M. Mythical models of gastric emptying and implications for food consumption studies.  
479 *Environ. Biol. Fishes* **16**, 35–50 (1986).
- 480 45. Rimoldini, L. Weighted skewness and kurtosis unbiased by sample size and Gaussian uncertainties.  
481 *Astron. Comput.* **5**, 1–8 (2014).
- 482 46. Schneider, F. D., Brose, U., Rall, B. C. & Guill, C. Animal diversity and ecosystem functioning in  
483 dynamic food webs. *Nat. Commun.* **7**, 1–8 (2016).
- 484 47. Yodzis, P. & Innes, S. Body Size and Consumer-Resource Dynamics. *Am. Nat.* **139**, 1151–1175 (1992).
- 485 48. Lang, B., Ehnes, R. B., Brose, U. & Rall, B. C. Temperature and consumer type dependencies of energy  
486 flows in natural communities. *Oikos* **126**, 1717–1725 (2017).
- 487 49. Hirt, M. R., Lauermann, T., Brose, U., Noldus, L. P. J. J. & Dell, A. I. The little things that run: a  
488 general scaling of invertebrate exploratory speed with body mass. *Ecology* **98**, 2751–2757 (2017).
- 489 50. Delmas, E., Brose, U., Gravel, D., Stouffer, D. B. & Poisot, T. Simulations of biomass dynamics in  
490 community food webs. *Methods Ecol. Evol.* **8**, 881–886 (2017).
- 491 51. Gauzens, B., Berti, E., Delmas, E. & Brose, U. ATNr : Allometric trophic models in R. (2022)  
492 doi:10.1101/2022.08.26.505404.

493  
494

495 **Acknowledgements:** We are profoundly grateful that Wolf E. Arntz collected and provided the valuable data  
496 set from his early work in Kiel Bay that we used in this study. We are also thankful to Astrid Jarre who digitized  
497 the stomach content data, Ute Jacob for her help in the early phase of this project and Carlos Melian for his  
498 friendly review of the manuscript. BG, UB, BR, TB, MJ gratefully acknowledge the support of iDiv funded by  
499 the German Research Foundation (DFG–FZT 118, 202548816). GK acknowledges funding from the German  
500 Academic Exchange Service (DAAD, 57070483). MJ acknowledges funding by the European Research Council  
501 (ERC) under the European Union’s Horizon 2020 research and innovation programme (grant agreement no.  
502 677232).

503

504 **Author contributions:**

505 Conceptualization: BG, BR, UB

506 Methodology: BG, BR, TB

507 Investigation: BG, BR

508 Resources: GK, SK, EOG

509 Funding acquisition: UB

510 Supervision: UB

511 Writing – original draft: BG

512 Writing – review & editing: BG, BR, GK, TB, MJ, SK, EOG, UB

513

514 **Competing interest:** Authors declare that they have no competing interests

515

516 **Materials & Correspondence:** Correspondence and material requests should be addressed to Benoit

517 Gauzens

518

519

520 **Tables**

521

522 Table 1: response of the realized distribution to predator body mass and environmental gradients

| <i>Predictors</i>                        | <b>Median of the realised distribution</b> |               |                  |
|------------------------------------------|--------------------------------------------|---------------|------------------|
|                                          | <i>Estimates</i>                           | <i>CI</i>     | <i>p</i>         |
| (Intercept)                              | -1.24                                      | -2.40 – -0.08 | <b>0.036</b>     |
| Predator body mass                       | 0.65                                       | 0.08 – 1.23   | <b>0.026</b>     |
| Productivity                             | 0.44                                       | -0.01 – 0.90  | 0.054            |
| Shape (fusiform)                         | 0.09                                       | -0.05 – 0.23  | 0.191            |
| Temperature                              | -0.02                                      | -0.03 – -0.01 | <b>&lt;0.001</b> |
| pred.BM:Productivity                     | -0.16                                      | -0.39 – 0.06  | 0.153            |
| shapefusiform:temperature                | -0.02                                      | -0.03 – -0.00 | <b>0.032</b>     |
| Observations                             | 290                                        |               |                  |
| R <sup>2</sup> / R <sup>2</sup> adjusted | 0.286 / 0.271                              |               |                  |

523

524

525

526 Table 2: response of the preference distribution to predator body mass and environmental gradients

| <i>Predictors</i>        | <b>Median of the preference distribution</b> |                 |
|--------------------------|----------------------------------------------|-----------------|
|                          | <i>Estimates</i>                             | <i>CI (95%)</i> |
| Intercept                | -1.06                                        | -3.25 – 0.99    |
| Predator body mass       | 0.55                                         | 0.40 – 0.70     |
| Temperature              | 0.18                                         | -0.03 – 0.39    |
| Productivity             | 0.18                                         | -0.53 – 0.92    |
| temperature:productivity | -0.07                                        | -0.14 – 0.00    |
| Observations             | 290                                          |                 |
| R <sup>2</sup> Bayes     | 0.279                                        |                 |

527

528 **Figures**

529

530 **Fig. 1:**

531

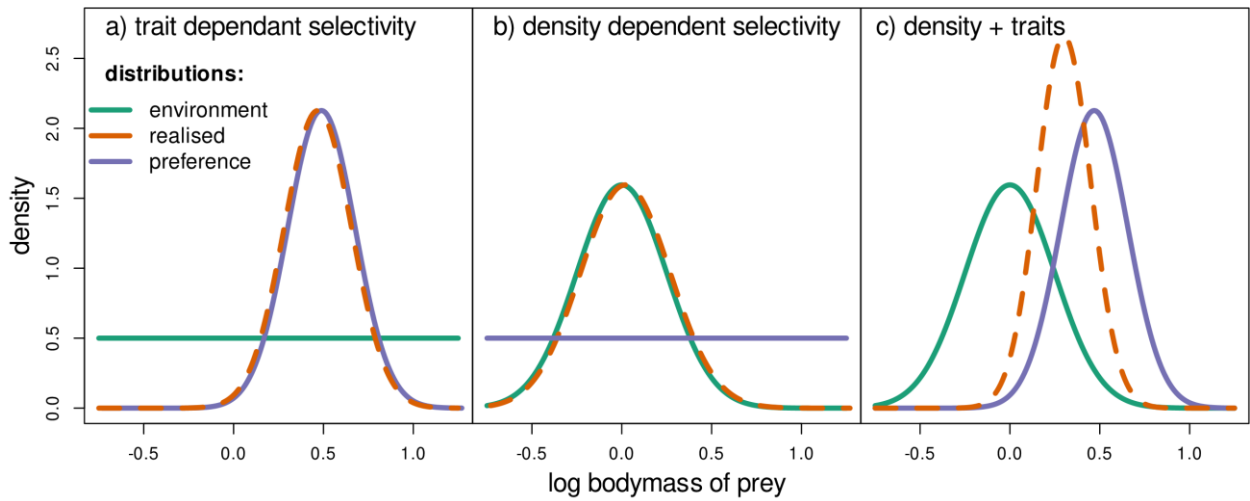

532

533

534

535

536

537

538

539

540

541

542

543

544

545

546

547

548

549

Fig. 1: Illustration of the different fish prey body mass distributions. The environmental distribution (green) represents the distribution of prey body mass in the ecosystem, the realized distribution (dashed red) represents the body mass of the prey in a consumer stomach, and the preference distribution (blue) represents the selectivity of a consumer for a specific prey body mass. a) All of the log prey body masses are equally represented in the environment, so the distribution of prey body masses observed in a consumer's gut represents the body masses on which it actively foraged (its preference distribution) and predation is driven by trait selectivity only (hypothesis 1). b) The body mass distribution of the prey observed in the gut and in the environment are equivalent, so the prey consumed by the predator were entirely driven by encounter probabilities (i.e. a neutral process), implying no active selectivity over specific prey size classes (hypothesis 2). Panels a) and b) represent extreme scenarios while real-world data are more likely to be described by two different distributions, as in c) where the body mass distribution of prey observed in the stomach and in the environment differs, so that the consumer specifically forages on some prey body masses that are over-represented in fish stomachs compared to what is available in the environment.

550 **Fig. 2:**  
551

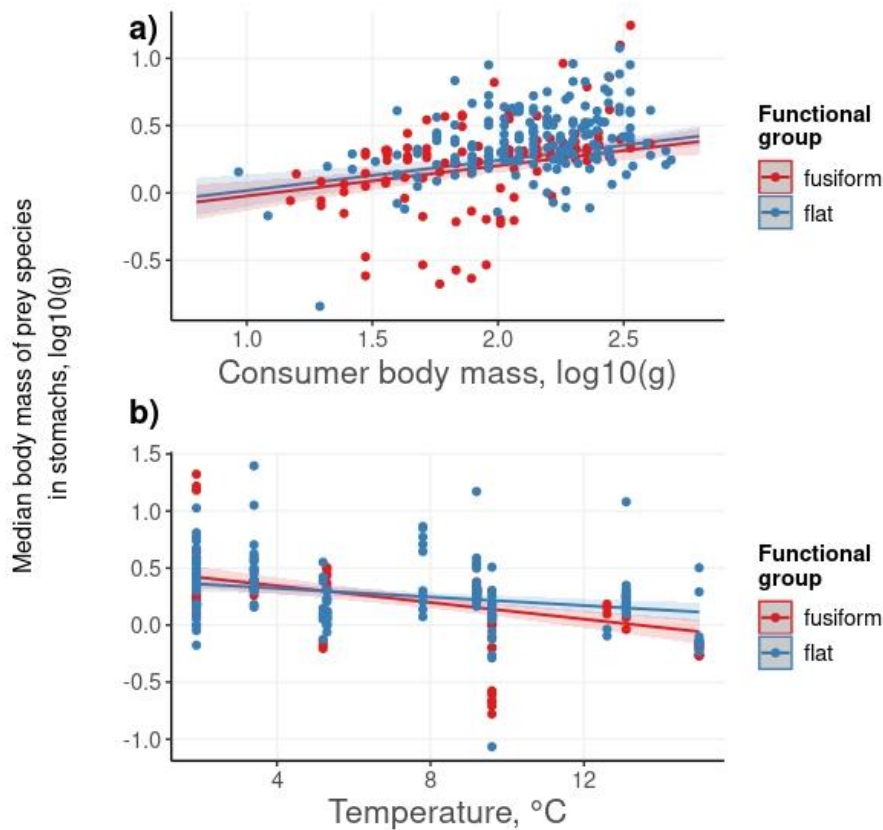

552  
553  
554  
555  
556  
557  
558  
559  
560

Fig. 2: Response of the median body mass of the realized prey body mass distribution. Response to predator body mass (a), and temperature (b) for the two fish functional groups. Points represent non-transformed data across all productivity levels and lines present model predictions. Regression lines represent model's prediction when all other covariates are considered. The shaded areas show the 95% confidence interval on the predicted values.

561 **Fig. 3:**

562

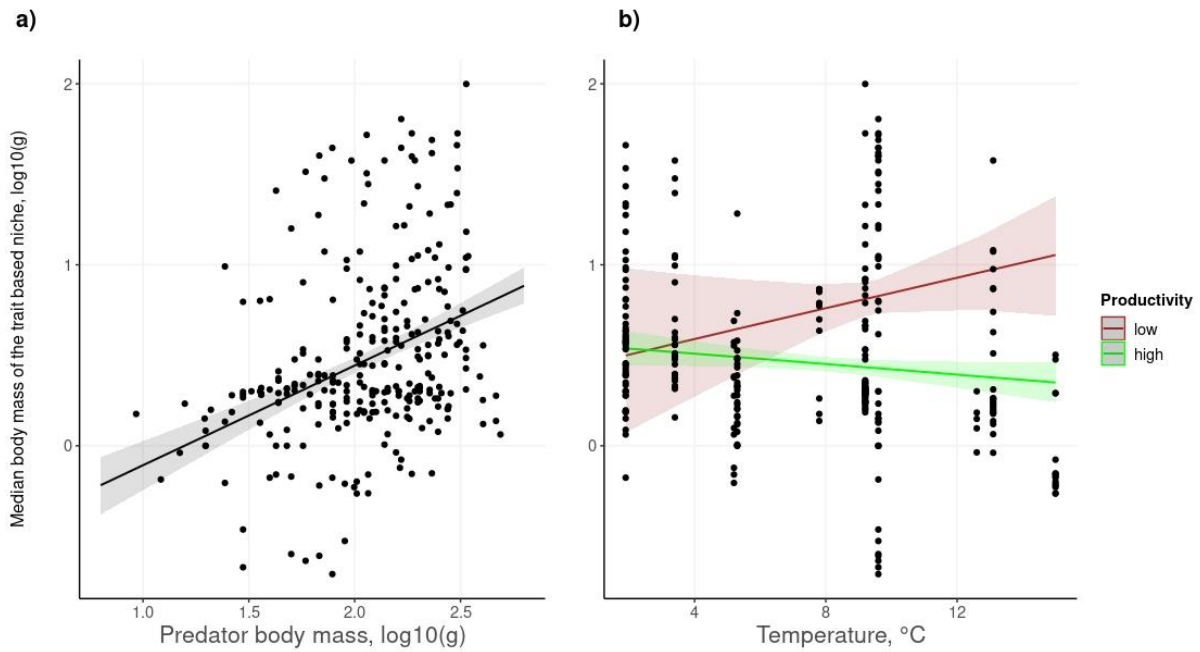

563

564

565

566

567

568

569

570

571

Fig. 3: Response of the median prey body mass of the preference distribution to (a) predator body mass and (b) temperature and productivity. Points represent non-transformed data across all productivity levels and lines represent model predictions. Regression lines represent model's prediction when all other covariates are considered. The shaded areas show the 95% confidence interval on the predicted values.

572 **Fig. 4:**  
573  
574

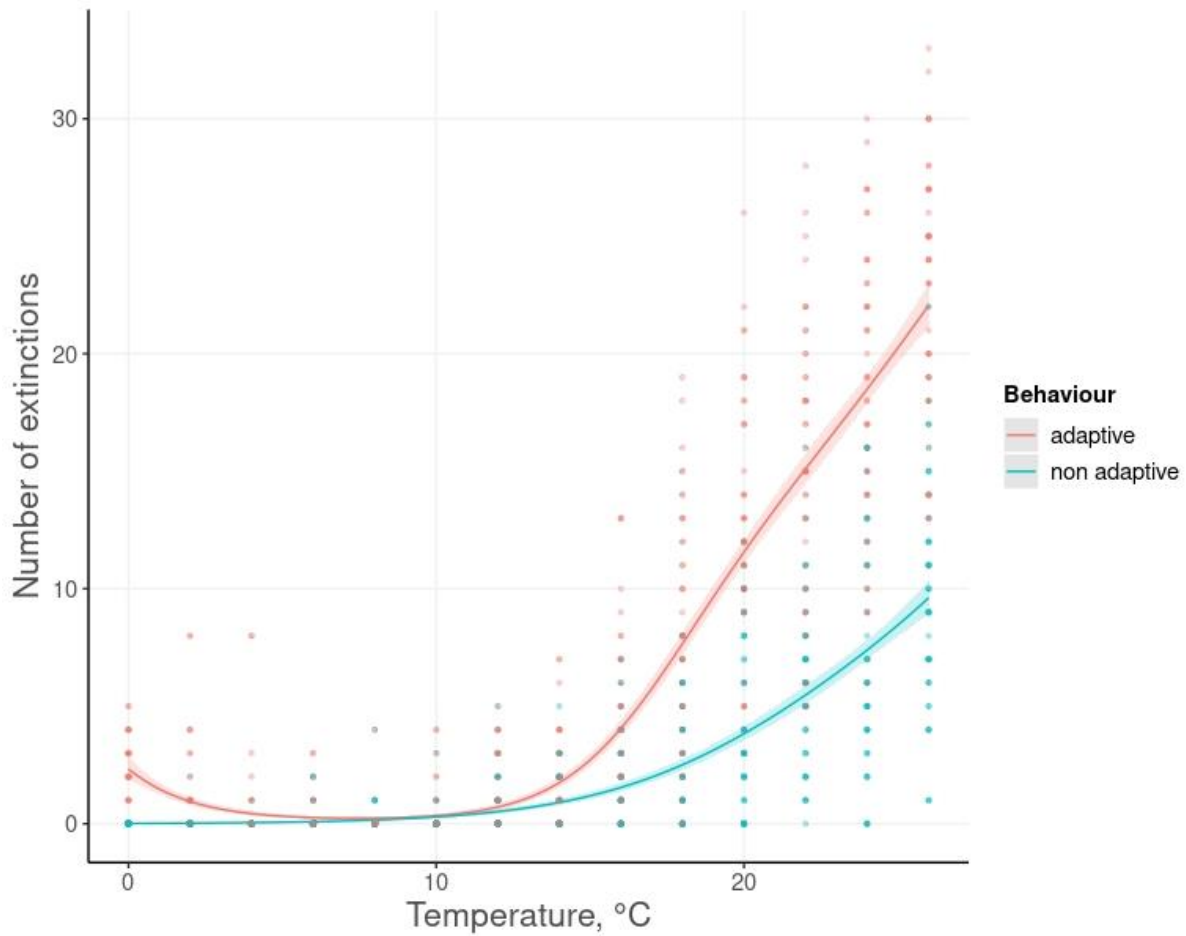

575  
576  
577  
578  
579  
580  
581  
582  
583  
584

Fig. 4: Number of species extinctions predicted by the model at different temperatures. The blue line represents the model output with adaptation of species diets to local temperature and productivity conditions considered, whilst the red line shows extinctions without allowing for this adaptation. The shaded areas show the 95% confidence interval on the predicted values. Predictions were estimated using a GAM with a binomial link function.
