# Supplementary material for: Flexible foraging behaviour increases predator vulnerability to climate change
Source: bioRxiv or medRxiv preprint supplement (doi:10.1101/2021.05.05.442768), 2024-02-07
Supplement: Supplementary file [file media-1.pdf]

# Supplementary Information

## **Adaptive foraging behaviour increases vulnerability to climate change**

Benoit Gauzens\*, Benjamin Rosenbaum, Gregor Kalinkat, Thomas Boy, Malte Jochum, Susanne Kortsch, Eoin J. O’Gorman, Ulrich Brose

\* Corresponding author: [benoit.gauzens@idiv.de](mailto:benoit.gauzens@idiv.de)

### **Supplementary information I: Environmental characteristics**

Overall, the different environments considered were characterised by two contrasted levels of productivity, leading to a bimodal distribution.

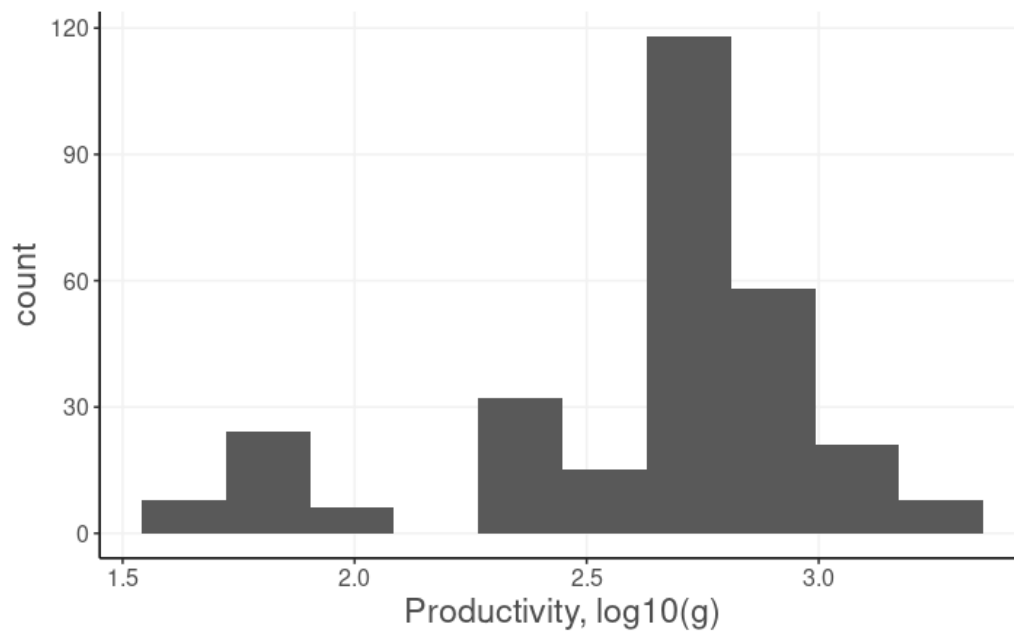

Fig. SI 1.1: distribution of the productivity values (g) for the different environments

Associated to these differences, we observed that the body mass distribution of the basal species (median and standard deviation) was responding differently to temperature depending on productivity values (Figure SI 1.2, Table SI 1.1):

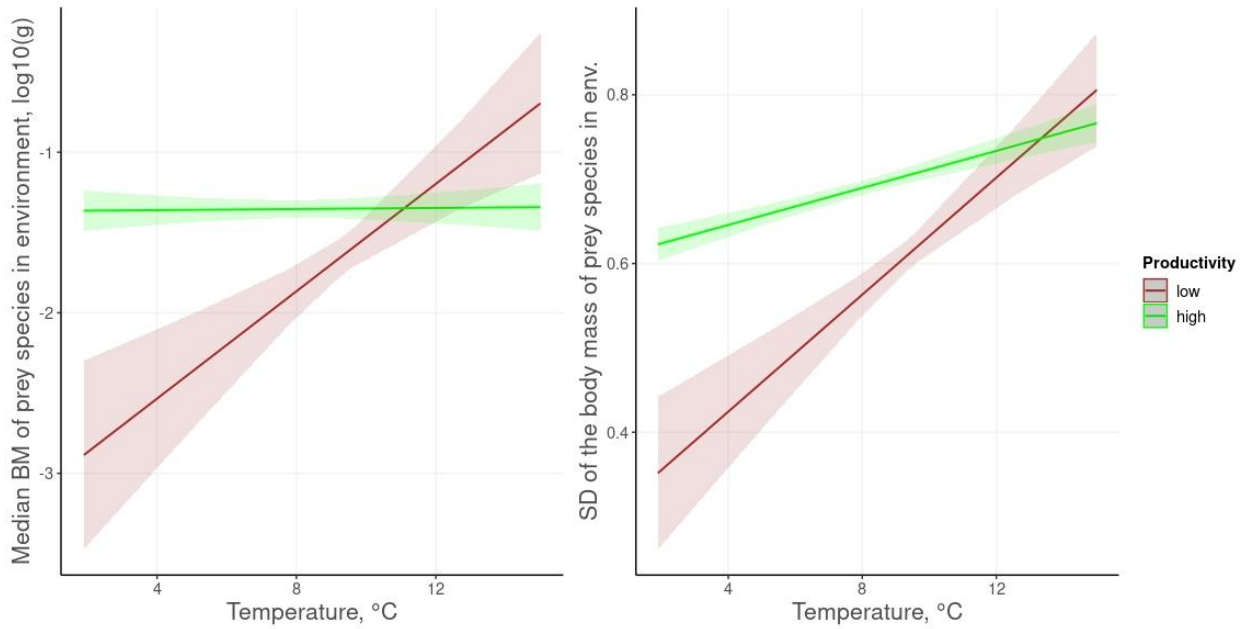

Fig. SI 1.2: response of the body mass structure of the resource species to temperature and productivity

Table SI 1.1: model estimate for the prediction of median and standard deviation of the environment distributions

| <i>Predictors</i>                        | <b>Median of BM</b> |               |                  | <b>Standard deviation of BM</b> |               |                  |
|------------------------------------------|---------------------|---------------|------------------|---------------------------------|---------------|------------------|
|                                          | <i>Estimates</i>    | <i>CI</i>     | <i>p</i>         | <i>Estimates</i>                | <i>CI</i>     | <i>p</i>         |
| (Intercept)                              | -7.56               | -9.74 – -5.38 | <b>&lt;0.001</b> | -0.46                           | -0.80 – -0.13 | <b>0.007</b>     |
| Productivity                             | 2.29                | 1.53 – 3.06   | <b>&lt;0.001</b> | 0.40                            | 0.28 – 0.51   | <b>&lt;0.001</b> |
| Temperature                              | 0.56                | 0.34 – 0.78   | <b>&lt;0.001</b> | 0.09                            | 0.06 – 0.13   | <b>&lt;0.001</b> |
| productivity:temperature                 | -0.21               | -0.28 – -0.13 | <b>&lt;0.001</b> | -0.03                           | -0.04 – -0.02 | <b>&lt;0.001</b> |
| Observations                             | 290                 |               |                  | 290                             |               |                  |
| R <sup>2</sup> / R <sup>2</sup> adjusted | 0.209 / 0.201       |               |                  | 0.311 / 0.304                   |               |                  |

**Supplementary information II: response of the preferred distribution to temperature at different levels of productivity**

As we observed a strong interaction effect between temperature and productivity when explaining the response of the median of the body mass distributions in our different environments, we estimated for which levels of productivity the relationship between temperature and median was significant. At low productivity, we observed a positive slope between the median and temperature albeit not significant. The slope of the regression linearly decreased with productivity value, and became significantly lower than 0 for productivity levels larger than  $10^{2.52}$ .

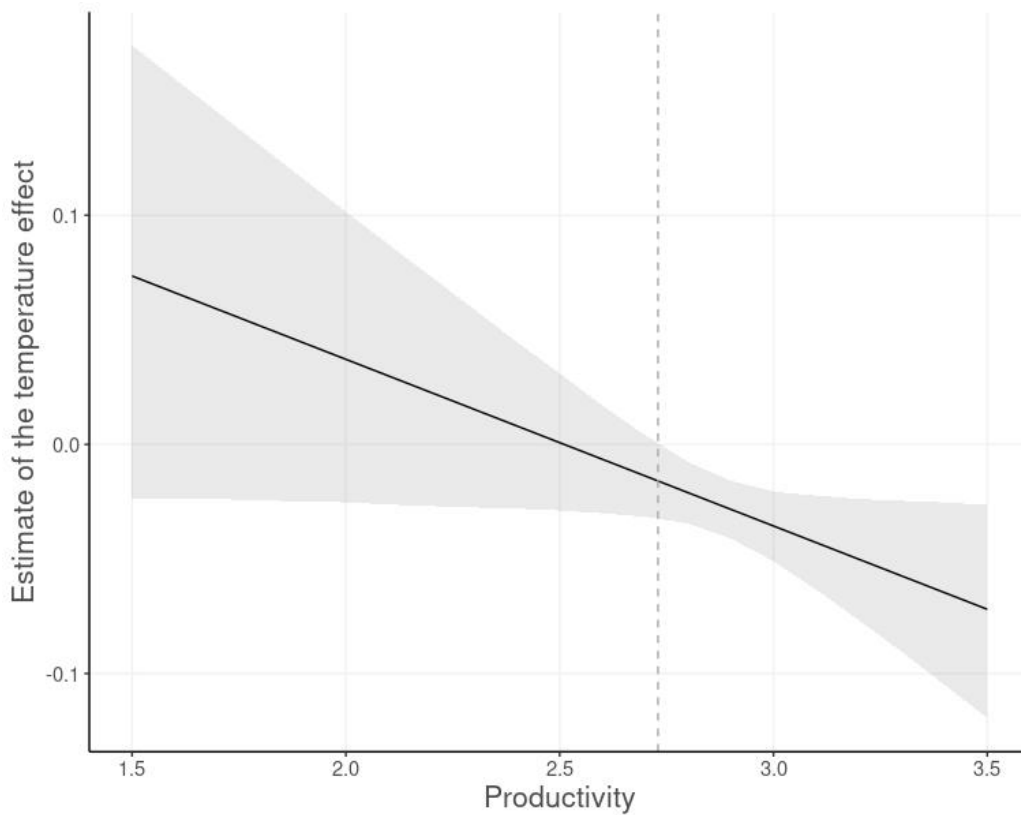

Fig. SI 2.1: Estimate and CI for the temperature effect at different levels of productivity. the dashed line indicates the productivity value above which the temperature effect become significant

### Supplementary information III: response of the width of the preferred trophic niche to local conditions

To assess how the width of the preferred niche responded to environmental conditions we fitted the same models as for the median on the standard deviation of the body mass of the preferred distribution. We observed that the standard deviation was increasing with the predator body mass. Temperature effect is related to the productivity levels: at low productivity level, we observed that the standard deviation of the preferred body mass distribution increased, while this effect became weaker – and even negative- at higher productivity levels.

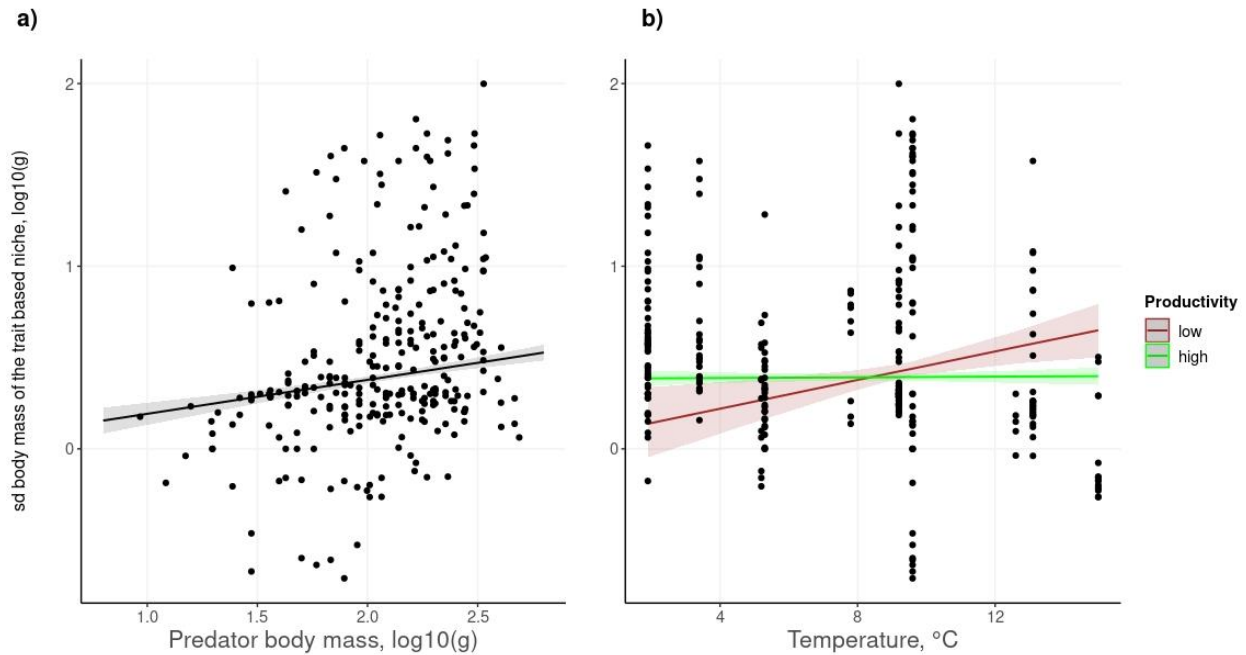

Fig. SI 3.1: Response of the width (standard deviation) of the preferred distribution to predator body mass (a) and temperature for different productivity gradients (b,c). Colours define the fish body shape.

Table SI 3.1: model estimates for the prediction of the standard deviation of the preference distributions

| <b>Median of the preference distribution</b> |                  |                 |
|----------------------------------------------|------------------|-----------------|
| <i>Predictors</i>                            | <i>Estimates</i> | <i>CI (95%)</i> |
| Intercept                                    | -1.07            | -3.01 – 0.87    |
| Predator body mass                           | 0.55             | 0.40 – 0.71     |
| Temperature                                  | 0.18             | -0.02 – 0.37    |
| Productivity                                 | 0.18             | -0.49 – 0.85    |
| temperature:productivity                     | -0.07            | -0.14 – -0.00   |
| Observations                                 | 290              |                 |
| R <sup>2</sup> Bayes                         | 0.279            |                 |

**Supplementary information IV: Effect of nutrient availability and predators' functional responses type on predictions about species coexistence.**

As maximum nutrient availability (variable  $S_i$ ) and shape of the functional response ( $q$ ) are not empirically informed, we analysed how sensitive to these two parameters model's predictions are. We varied  $S_i$  from 5 to 240 and  $q$  from 1 to 1.8. Overall, we observed an effect of nutrient availability on the pattern observed (Fig. SI5.1). The classic result of nutrient availability rescuing food webs from the detrimental of temperature increase is only observed without the consideration of adaptive foraging. The type of the functional response used resulted in more variations on the number of extinctions observed, with differences in extinctions between the two different models increasing with  $q$  (Fig. SI5.2).

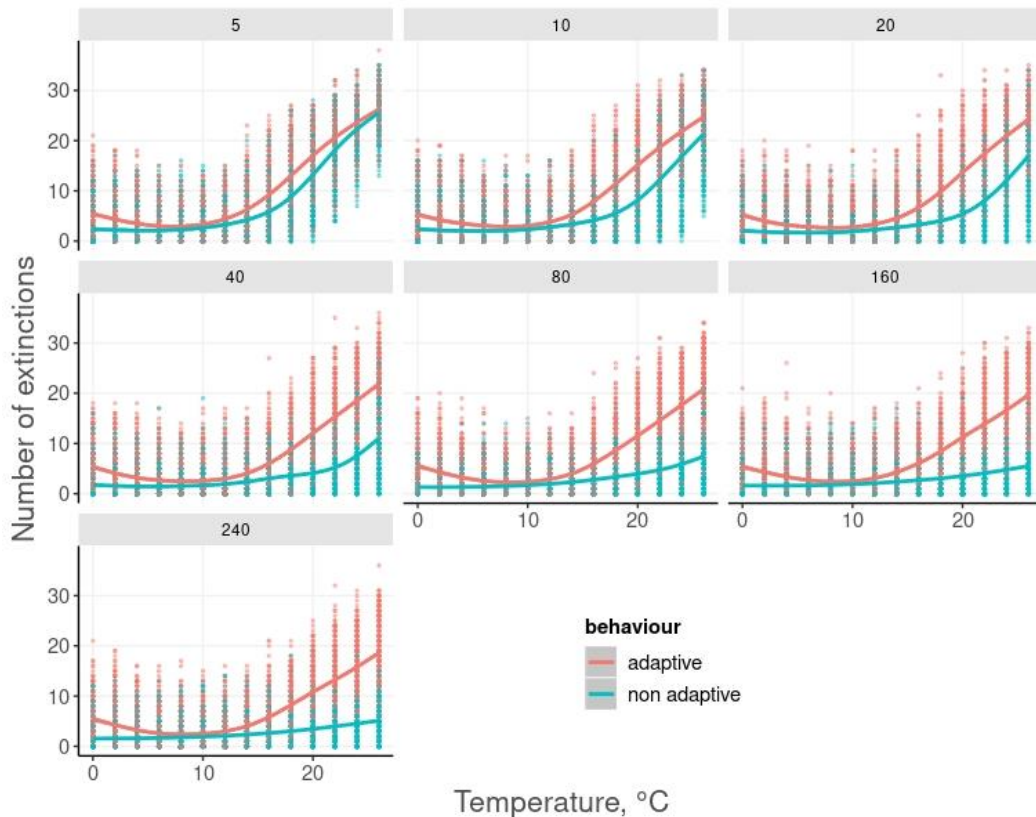

Figure SI 4.1: Effect of different levels of nutrient availability on the number of extinctions predicted by the model. Simulations were run with all hill exponent ( $q$ ) values.

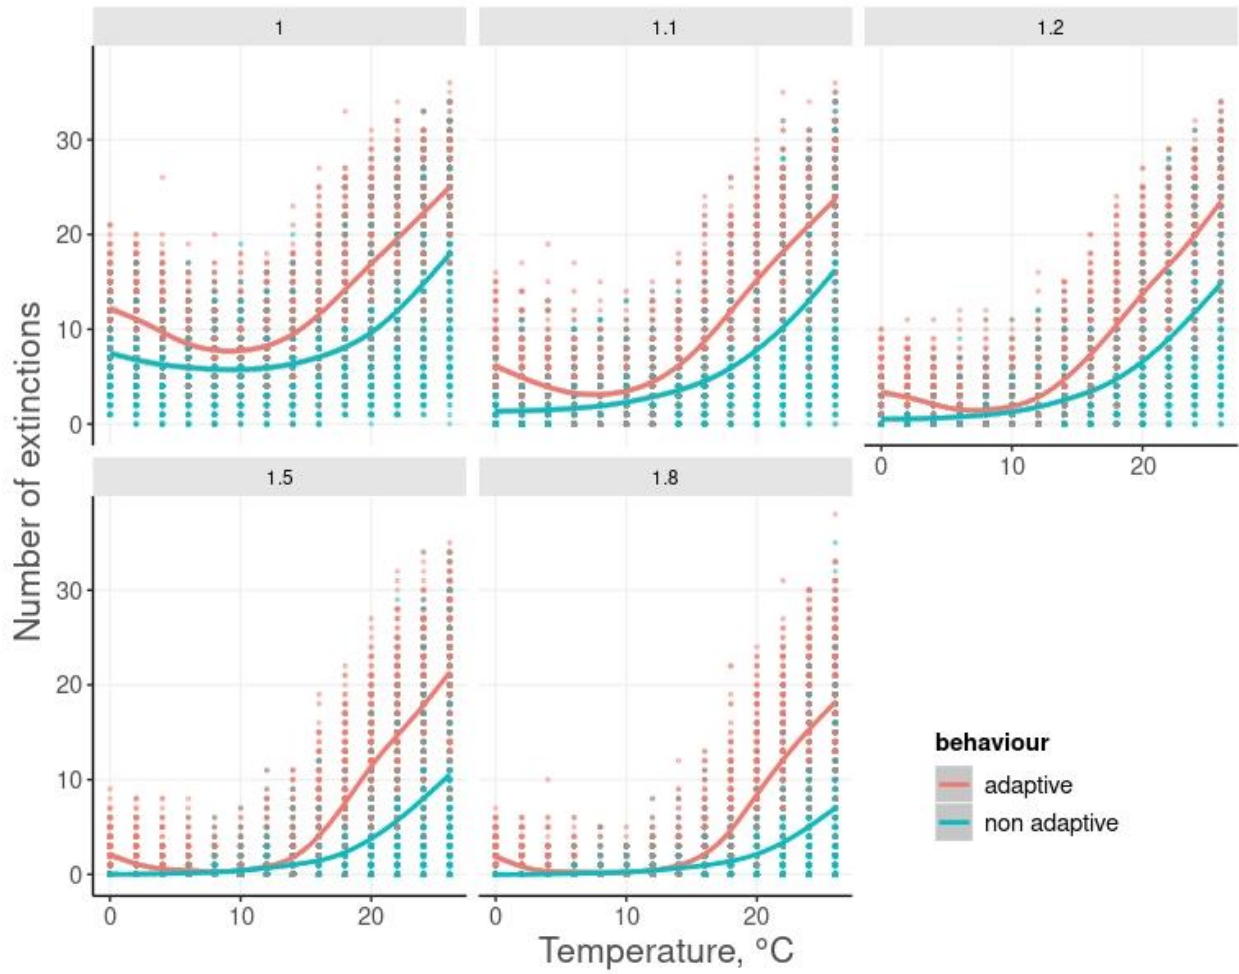

Figure SI4.2: effect of the choice of functional response type on the number of extinctions predicted by the model. Simulations were run for all levels of maximum nutrient concentration (S).

## Supplementary information V: Effect of considering different detection probabilities for prey in stomachs

As prey composed of soft tissues only are supposed to be less likely to be detected because of a faster digestion time, we corrected our observation by multiplying the abundance of species with hard body parts by 0.8. This was done to mirror the importance of these species that should persist longer in stomachs. As we are missing a general framework to properly describe how digestion time changes for the different species we used a unique correction factor that is a free parameter in our model (prey are either easy or difficult to digest, Table SI 6.3). We here present the results we would have obtained without using this correction factor.

Figure SI5.1: Response of the median body mass of the preferred prey body mass distribution to predator body mass (a), temperature (b) at different productivity levels. Points represent non-transformed data and lines present model predictions. The shaded areas show the 95% confidence interval on the predicted values.

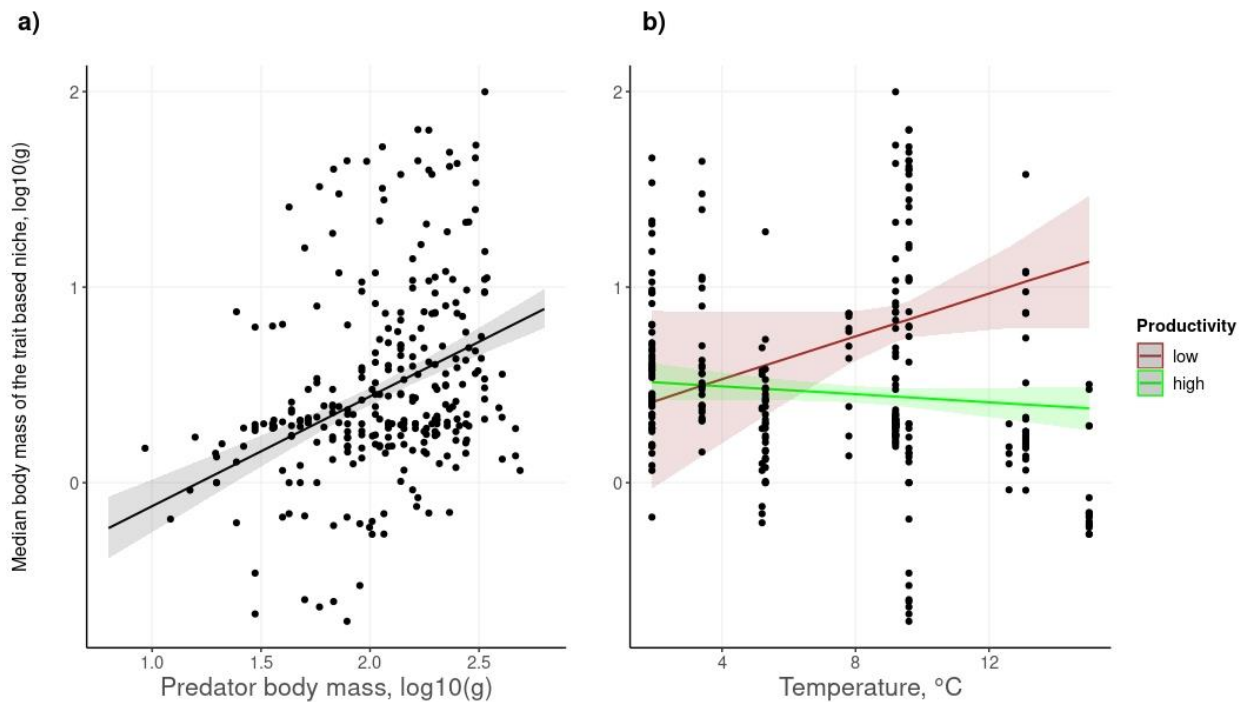



Table SI5.1: response of the realised distribution to predator body mass and environmental gradients

| <b>Median of the preference distribution</b> |                  |                 |
|----------------------------------------------|------------------|-----------------|
| <i>Predictors</i>                            | <i>Estimates</i> | <i>CI (95%)</i> |
| Intercept                                    | -1.38            | -3.39 – 0.76    |
| Predator body mass                           | 0.57             | 0.41 – 0.71     |
| Temperature                                  | 0.21             | -0.01 – 0.41    |
| Productivity                                 | 0.28             | -0.46 – 0.98    |
| temperature:productivity                     | -0.08            | -0.15 – -0.01   |
| Observations                                 | 290              |                 |
| R <sup>2</sup> Bayes                         | 0.279            |                 |

We can observe that the absence of correction factor does not qualitatively change the trends observed for the preference distributions. We can only detect slight changes in the model estimates.

Table SI5.2: Classification of species' digestibility Classification of species' digestibility

| <b>Prey species</b>           | <b>Class</b>     | <b>Digestibility</b> |
|-------------------------------|------------------|----------------------|
| <i>Abra alba</i>              | Bivalvia         | Hard                 |
| <i>Aloidis gibba</i>          | Bivalvia         | Hard                 |
| <i>Amphicteis gunneri</i>     | Polychaeta       | Easy                 |
| <i>Amphipoda</i> spp.         | Malacostraca     | Easy                 |
| <i>Anaitides</i> spp.         | Polychaeta       | Easy                 |
| <i>Anthozoa</i> spp.          | Anthozoa         | Easy                 |
| <i>Aphia minuta</i>           | Actinopterygii   | Hard                 |
| <i>Aphroditidae</i> spp.      | Polychaeta       | Easy                 |
| <i>Arenicola marina</i>       | Polychaeta       | Easy                 |
| <i>Ascidacea</i> spp.         | Ascidacea        | Easy                 |
| <i>Astarte</i> spp.           | Bivalvia         | Hard                 |
| <i>Balanus</i> spp.           | Hexanauplia      | Hard                 |
| <i>Brada villosa</i>          | Polychaeta       | Easy                 |
| <i>Capitella capitata</i>     | Polychaeta       | Easy                 |
| <i>Carcinus maenas</i>        | Malacostraca     | Hard                 |
| <i>Cardium fasciatum</i>      | Bivalvia         | Hard                 |
| <i>Castalia punctata</i>      | Polychaeta       | Easy                 |
| <i>Clupea harengus</i>        | Actinopterygii   | Hard                 |
| <i>Corophium</i> spp.         | Malacostraca     | Easy                 |
| <i>Crangon crangon</i>        | Malacostraca     | Hard                 |
| <i>Cumacea</i> spp.           | Malacostraca     | Easy                 |
| <i>Mysidacea</i> spp.         | Malacostraca     | Hard                 |
| <i>Cyprina islandica</i>      | Bivalvia         | Hard                 |
| <i>Diastylis rathkei</i>      | Malacostraca     | Easy                 |
| <i>Disoma multisectosum</i>   | Polychaeta       | Easy                 |
| <i>Euchone papillosa</i>      | Polychaeta       | Easy                 |
| <i>Gastosaccus spinifer</i>   | Malacostraca     | Hard                 |
| <i>Gobiidae</i> spp.          | Actinopterygii   | Hard                 |
| <i>Halicryptus spinolosus</i> | Halicryptomorpha | Hard                 |
| <i>Harmothoe imbricata</i>    | Polychaeta       | Easy                 |
| <i>Harmothoe</i> spp.         | Polychaeta       | Easy                 |
| <i>Hyperia galba</i>          | Malacostraca     | Easy                 |
| <i>Idothea</i> spp.           | Malacostraca     | Hard                 |
| <i>Isopoda</i> spp.           | Malacostraca     | Hard                 |
| <i>Limanda limanda</i>        | Actinopterygii   | Hard                 |

| <b>Prey species</b>        | <b>Class</b>   | <b>Digestibility</b> |
|----------------------------|----------------|----------------------|
| Macoma spp.                | Bivalvia       | Hard                 |
| Metridium senile           | Anthozoa       | Hard                 |
| Microdeutopus sp.          | Malacostraca   | Easy                 |
| Musculus spp.              | Bivalvia       | Hard                 |
| Mya truncata, Mya arenaria | Bivalvia       | Hard                 |
| Mysis mixta                | Malacostraca   | Hard                 |
| Mytilus edulis             | Bivalvia       | Hard                 |
| Nemertea spp.              | Nemertea       | Easy                 |
| Nephtys spp.               | Polychaeta     | Easy                 |
| Nucula nitida              | Bivalvia       | Hard                 |
| Ophiura albida             | Ophiuroidea    | Hard                 |
| Other Decapoda             | Decapoda       | Hard                 |
| Other Gastropoda           | Gastropoda     | Hard                 |
| Other Polychaeta           | Polychaeta     | Easy                 |
| Pectinaria koreni          | Polychaeta     | Easy                 |
| Phaxas pellucidus          | Bivalvia       | Hard                 |
| Pherusa plumosa            | Polychaeta     | Easy                 |
| Phtisica marina, Caprella  | Malacostraca   | Easy                 |
| Pisces spp.                | Actinopterygii | Hard                 |
| Pleuronectiformes spp.     | Actinopterygii | Hard                 |
| Polydora sp.               | Polychaeta     | Easy                 |
| Pomatoschistus minutus     | Actinopterygii | Hard                 |
| Priapulus caudatus         | Priapulida     | Easy                 |
| Saxicava arctica           | Bivalvia       | Hard                 |
| Scoloplos armiger          | Polychaeta     | Easy                 |
| Spionidae spp.             | Polychaeta     | Easy                 |
| Terebellides stroemi       | Polychaeta     | Easy                 |
| Thyonidium pellucidum      | Holothuroidea  | Hard                 |

**Supplementary information VI: Comparison of models with and without fish body shape as a covariate to predict the median of the preferred distribution**

Table SI5.2: Results of model selection using Leave-one-out cross validation

|                     | elpd_diff | se_diff |
|---------------------|-----------|---------|
| Model with shape    | 0.0       | 0.0     |
| model.without shape | -1.0      | 2.4     |
